# Supplementary material for: Mining TCGA Data for Key Biomarkers Related to Immune Microenvironment in Endometrial cancer by Immune Score and Weighted Correlation Network Analysis
Source: Frontiers journal article supplement (doi:10.3389/fmolb.2021.645388), 2021-03-26
Supplement: downloadfile [file 645388]

Supplementary Table 2 Results of the KEGG analysis for the black module identified by WGCNA. WGCNA, Weighted gene co-expression network analysis.KEGG,Kyoto Encyclopedia of Genes and Genomes
ID	Description	GeneRatio	BgRatio	pvalue	p.adjust	qvalue	geneID	Count
hsa04610	Complement and coagulation cascades	4/33	85/8077	0.000370417	0.027040419	0.023394739	715/716/1675/710	4
hsa05171	Coronavirus disease - COVID-19	4/33	231/8077	0.01391518	0.145115448	0.125550496	715/716/1675/3627	4
hsa05133	Pertussis	3/33	76/8077	0.003566257	0.12733879	0.110170546	715/716/710	3
hsa05150	Staphylococcus aureus infection	3/33	96/8077	0.006857728	0.12733879	0.110170546	715/716/1675	3
hsa04061	Viral protein interaction with cytokine and cytokine receptor	3/33	100/8077	0.00767565	0.12733879	0.110170546	6362/6368/3627	3
hsa04668	TNF signaling pathway	3/33	112/8077	0.010466202	0.12733879	0.110170546	3627/4318/7412	3
hsa05143	African trypanosomiasis	2/33	37/8077	0.009860352	0.12733879	0.110170546	3620/7412	2
hsa05144	Malaria	2/33	50/8077	0.017547894	0.160124532	0.138536005	2995/7412	2
