# Supplementary material for: Mining TCGA Data for Key Biomarkers Related to Immune Microenvironment in Endometrial cancer by Immune Score and Weighted Correlation Network Analysis
Source: Front Mol Biosci. 2021 Mar 26;8:645388. doi: 10.3389/fmolb.2021.645388 (PMC8048410; doi:10.3389/fmolb.2021.645388)
Supplement: Supplementary file 2 [file Datasheet1.csv]

<!DOCTYPE html>
<!-- saved from url=(0090)https://www.frontiersin.org/articles/10.3389/fmolb.2021.645388/full#supplementary-material -->
<html lang="en" class=" js flexbox flexboxlegacy canvas canvastext webgl no-touch geolocation postmessage websqldatabase indexeddb hashchange history draganddrop websockets rgba hsla multiplebgs backgroundsize borderimage borderradius boxshadow textshadow opacity cssanimations csscolumns cssgradients cssreflections csstransforms csstransforms3d csstransitions fontface generatedcontent video audio…
<!-- Google Tag Manager -->
<script async="" src="./Datasheet1_files/gtm.js.download"></script><script>
(function (w	d	s	l	i) {
w[l] = w[l] || []; w[l].push({ 'gtm.start': new Date().getTime()	event: 'gtm.js' });
var f = d.getElementsByTagName(s)[0]	j = d.createElement(s)	dl = l != 'dataLayer' ? '&l=' + l : ''; j.async = true;
j.src = 'https://www.googletagmanager.com/gtm.js?id=' + i + dl + '&gtm_auth=fCzlsmYQFAUQ_UXneGJNag&gtm_preview=env-2&gtm_cookies_win=x';
f.parentNode.insertBefore(j	f);
})(window	document	'script'	'dataLayer'	'GTM-TZGWTGG');
</script>
<!-- End Google Tag Manager -->
<meta http-equiv="X-UA-Compatible" content="IE=edge"><script type="text/javascript">window.NREUM||(NREUM={});NREUM.info = {"beacon":"bam.nr-data.net"	errorBeacon:"bam.nr-data.net"	licenseKey:"598a124f17"	applicationID:"3007887"	transactionName:"MQcDMkECCkNSW0YMWghNLDBwTCVCR1FRCVAlDQ8SQQwIXFZKHSNACg41A0sXJkl3d3s="	queueTime:0	applicationTime:6824	agent:""	atts:""}</script><script type="text/javascript">(window.NREUM||(NREUM={})).loader_config={xpid:"VgUHUl5WGwAAVFZaDwY="	licenseKey:"598a124f17"	applicationID:"3007887"};window.NREUM||(NREUM={})	__nr_require=function(t	e	n){function r(n){if(!e[n]){var i=e[n]={exports:{}};t[n][0].call(i.exports	function(e){var i=t[n][1][e];return r(i||e)}	i	i.exports)}return e[n].exports}if("function"==typeof __nr_require)return __nr_require;for(var i=0;i<n.length;i++)r(n[i]);return r}({1:[function(t	e	n){function r(t){try{c.console&&console.log(t)}catch(e){}}var i	o=t("ee")	a=t(24)	c={};try{i=localStorage.getItem("__nr_flags").split("	),console&&function"==typeof console.log&&(c.console=!0	i.indexOf("dev")!==-1&&(c.dev=!0)	i.indexOf("nr_dev")!==-1&&(c.nrDev=!0))}catch(s){}c.nrDev&&o.on("internal-error"	function(t){r(t.stack)})	c.dev&&o.on("fn-err"	function(t	e	n){r(n.stack)})	c.dev&&(r("NR AGENT IN DEVELOPMENT MODE")	r("flags: "+a(c	function(t	e){return t}).join("	")))}	{}]	2:[function(t	e	n){function r(t	e	n	r	c){try{p?p-=1:i(c||new UncaughtException(t	e	n)	!0)}catch(f){try{o("ierr"	[f	s.now()	!0])}catch(d){}}return"function"==typeof u&&u.apply(this	a(arguments))}function UncaughtException(t
<meta name="viewport" content="width=device-width	initial-scale=1	maximum-scale=1">
<title>Frontiers | Mining TCGA data for key biomarkers related to immune microenvironment in endometrial carcinoma by immune score and weighted correlation network analysis | Molecular Biosciences</title>
<link rel="shortcut icon" href="https://3718aeafc638f96f5bd6-d4a9ca15fc46ba40e71f94dec0aad28c.ssl.cf1.rackcdn.com/favicon_16x16.ico" type="image/x-icon">
<meta property="og:type" content="article">
<meta property="frontiers:type" content="Article">
<meta property="og:site_name" name="site_name" content="Frontiers">
<meta property="og:title" name="Title" content="Mining TCGA data for key biomarkers related to immune microenvironment in endometrial carcinoma by immune score and weighted correlation network analysis">
<meta property="og:description" name="Description" content="Background: Endometrial cancer (EC) is one of the most lethal gynecological cancers around the world. The aim of this study is to identify the potential immune microenvironment-related biomarkers associated with the prognosis for EC.Methods: RNA-seq data and clinical information of EC patients were derived from The Cancer Genome Atlas (T…	CIBERSORT was applied to evaluate the relative abundances of 22 immune cell types in EC.Results: Immune scores were significantly associated with tumor grade and histology of EC	and high immune scores may exert a protective influence on the survival outcome for EC. WCGNA indicated that the black module was significantly correlated with the immune score. Function analysis revealed it mainly involved in those terms related to immune regulation and inflammatory response. Moreover	11 key genes (APOL3	C10orf54	CLEC2B	GIMAP1	GIMAP4	GIMAP6	GIMAP7	GIMAP8	GYPC	IFFO1	TAGAP) were identified from the black module	validated by the GEPIA database	and revealed strong correlations with infiltration levels of multiple immune cell types	as was the prognosis of EC.Conclusion: In this study	11 key genes showed abnormal express...">
<meta property="og:url" name="url" content="https://www.frontiersin.org/article/10.3389/fmolb.2021.645388/full">
<link href="./Datasheet1_files/css" rel="stylesheet">
<link href="./Datasheet1_files/css(1)" rel="stylesheet">
<meta property="og:image" content="https://www.frontiersin.org/files/MyHome%20Article%20Library/645388/645388_Thumb_400.jpg">
<meta name="citation_volume" content="8">
<meta name="citation_journal_title" content="Frontiers in Molecular Biosciences">
<meta name="citation_publisher" content="Frontiers">
<meta name="citation_journal_abbrev" content="Front. Mol. Biosci.">
<meta name="citation_issn" content="2296-889X">
<meta name="citation_doi" content="10.3389/fmolb.2021.645388">
<meta name="citation_pages" content="127">
<meta name="citation_language" content="English">
<meta name="citation_title" content="Mining TCGA data for key biomarkers related to immune microenvironment in endometrial carcinoma by immune score and weighted correlation network analysis">
<meta name="citation_keywords" content="endometrial cancer; immune microenvironment; biomarker; Estimate; CIBERSORT; WCGNA">
<meta name="citation_abstract" content="Background: Endometrial cancer (EC) is one of the most lethal gynecological cancers around the world. The aim of this study is to identify the potential immune microenvironment-related biomarkers associated with the prognosis for EC. Methods: RNA-seq data and clinical information of EC patients were derived from The Cancer Genome Atlas (TCGA). The immune sc…	CIBERSORT was applied to evaluate the relative abundances of 22 immune cell types in EC. Results: Immune scores were significantly associated with tumor grade and histology of EC	and high immune scores may exert a protective influence on the survival outcome for EC. WCGNA indicated that the black module was significantly correlated with the immune score. Function analysis revealed it mainly involved in those terms related to immune regulation and inflammatory response. Moreover	11 key genes (APOL3	C10orf54	CLEC2B	GIMAP1	GIMAP4	GIMAP6	GIMAP7	GIMAP8	GYPC	IFFO1	TAGAP) were identified from the black module	validated by the GEPIA database	and revealed strong correlations with infiltration levels of multiple immune cell types	as was the prognosis of EC. Conclusion: In this study	11 key genes showed abnormal expressions and strong correlations with immune infiltration in EC	most of which were significantly associated with the prognosis of EC. These findings made them promising therapeutic targets for the treatment of EC.">
<meta name="description" content="Background: Endometrial cancer (EC) is one of the most lethal gynecological cancers around the world. The aim of this study is to identify the potential immune microenvironment-related biomarkers associated with the prognosis for EC. Methods: RNA-seq data and clinical information of EC patients were derived from The Cancer Genome Atlas (TCGA). The immune score of…	CIBERSORT was applied to evaluate the relative abundances of 22 immune cell types in EC. Results: Immune scores were significantly associated with tumor grade and histology of EC	and high immune scores may exert a protective influence on the survival outcome for EC. WCGNA indicated that the black module was significantly correlated with the immune score. Function analysis revealed it mainly involved in those terms related to immune regulation and inflammatory response. Moreover	11 key genes (APOL3	C10orf54	CLEC2B	GIMAP1	GIMAP4	GIMAP6	GIMAP7	GIMAP8	GYPC	IFFO1	TAGAP) were identified from the black module	validated by the GEPIA database	and revealed strong correlations with infiltration levels of multiple immune cell types	as was the prognosis of EC. Conclusion: In this study	11 key genes showed abnormal expressions and strong correlations with immune infiltration in EC	most of which were significantly associated with the prognosis of EC. These findings made them promising therapeutic targets for the treatment of EC.">
<meta name="citation_online_date" content="2021/02/16">
<meta name="citation_date" content="2021">
<meta name="citation_author" content="Chengbin	Guo">
<meta name="citation_author_institution" content="Guangzhou Women and Children’s Medical Center	Guangzhou Medical University	Guangzhou	Guangdong Province	China">
<meta name="citation_author_email" content="609250340@qq.com">
<meta name="citation_author" content="Tang	Yuqin">
<meta name="citation_author_institution" content="School of Basic Medical Sciences	Chengdu University of Traditional Chinese Medicine	Chengdu	610075	Sichuan Province	China">
<meta name="citation_author_email" content="tangyuqin@stu.cdutcm.edu.cn">
<meta name="citation_author" content="Zhang	Yongqiang">
<meta name="citation_author_institution" content="Molecular Medicine Research Center	West China Hospital of Sichuan University	Chengdu	610041	Sichuan Province	China">
<meta name="citation_author_institution" content="West China School of Medicine	West China Hospital	Sichuan University	Chengdu	China">
<meta name="citation_author_email" content="859815764@qq.com">
<meta name="citation_author" content="Li	Gen">
<meta name="citation_author_institution" content="Guangzhou Women and Children’s Medical Center	Guangzhou Medical University	Guangzhou	Guangdong Province	China">
<meta name="citation_author_email" content="superleegen@hotmail.com">
<meta name="Keywords" content="endometrial cancer	immune microenvironment	biomarker	Estimate	CIBERSORT	WCGNA">
<meta name="robots" content="noindex	nofollow">
<script type="text/javascript">
var CurrentIBarMenu = 'bysubjects';
var CurrentPageCode = 'ARTICLE_PAGE_NEW';
var FRConfiguration = (function() {
return {
Environment: 'Live'
SANVirtualPath: 'https://www.frontiersin.org/files/'
SharepointWebsiteUrl: 'https://www.frontiersin.org'
FrontiersJournalUIUrl: 'https://www.frontiersin.org'
FrontiersJournalAPIUrl: 'https://api-journal.frontiersin.org'
FrontiersReviewUIUrl: ''
FrontiersReviewAPIUrl: ''
FrontiersCookie: 'frontiersN'
FrontiersCookieRememberMe: 'frontiersNt'
FrontiersLoginUrl: 'https://www.frontiersin.org/Login.aspx'
FrontiersRegistrationUrl: 'http://www.frontiersin.org/Registration/Register.aspx'
IsCommentVisible: 'True'
IsPreview:'False'
};
})();
var FRLanguage = (function() {
var languageSet = {"ART_FRONTIERS":"Frontiers "	Article_AcceptedDate:"Accepted: "	Article_AnalyticsToolTip:"The total view count is updated once a day	so not to worry if you don\u0027t see immediate results."	Article_AnalyticsTotalViews:"total views"	Article_AnalyticsViewImpact:"View Article Impact"	Article_ArchiveLinkText:"Articles"	Article_BibTex:"BibTex"	Article_Citation:"Citation: "	Article_Commentary:"COMMENTARY"	Article_Copyright:"Copyright: "	Article_CopyrightText:"This is an open-access article distributed under the terms of the \u003ca href=\"http://creativecommons.org/licenses/by/4.0/\"\u003eCreative Commons Attribution License (CC BY)\u003c/a\u003e. The use	distribution or reproduction in other forums is permitted	provided the original author(s) and the copyright owner(s) are credited and that the original publication in this journal is cited	in accordance with accepted academic practice. No use	distribution or reproduction is permitted which does not comply with these terms."	Article_Correspondence:"* Correspondence: "	Article_DownloadArticle:"Download Article"	Article_DownloadPDF:"Download PDF"	Article_DownloadProvisionalArticle:"Download Provisional Article"	Article_DownloadProvisionalPDF:"Download Provisional PDF"	Article_EditedBy:"Edited by: "	Article_EndNote:"EndNote"	Article_EPUB:"EPUB"	Article_ExportCitation:"Export Citation"	Article_JATS:"JATS"	Article_Keywords:"Keywords: "	Article_NLM:"XML (NLM)"	Article_OriginalArticle:"ORIGINAL ARTICLE"	Article_PaperPendingPublishedDate:"Paper pending published: "	Article_PDF:"PDF"	Article_ProvisionalPDF:"Provisional PDF"	Article_PublishedDate:"Published online: "	Article_ReadFullText:"Read Full Text"	Article_ReceivedDate:"Received: "	Article_ReferenceManager:"Reference Manager"	Article_ReviewedBy:"Reviewed by: "	Article_RTInfoText:"This article is part of the Research Topic"	Article_ShareOn:"SHARE ON"	Article_SimpleTEXTfile:"Simple TEXT file"	Article_SupplementalData:"SUPPLEMENTAL DATA"	Article_TableOfContent:"TABLE OF CONTENTS"	Article_ViewEnhancedPDF:"ReadCube"	Article_XML:"XML"	BrowserWarningText:"\u003ch2\u003eWarning!\u003c/h2\u003e\u003cp\u003eYou are using an \u003cstrong\u003eoutdated\u003c/strong\u003e browser. This page doesn\u0027t support Internet Explorer 6	7 and 8.\u003cbr /\u003ePlease \u003ca class=\"blue\" href=\"http://browsehappy.com/\"\u003eupgrade your browser\u003c/a\u003e or \u003ca class=\"blue\" href=\"http://www.google.com/chromeframe/?redirect=true\"\u003eactivate Google Chrome Frame\u003c/a\u003e to improve your experience.\u003c/p\u003e"	COMMENT_HEADERTEXT:"Comment text too long"	COMMENT_WARNINGTEXT:"Comments must be less than 4	000 characters. You have entered "	Impact_BackToArticle:"Back to article"
return {
value: function(key) {
if (languageSet[key]) {
return languageSet[key];
} else {
throw new Error('Unable to get the value status from the language set'); // Use Error	not FRError
}
}
};
})();
var FRJournalDetails = (function() {
return {
JournalType: 'section'
JournalId: '698'
SectionId: '701'
};
})();
var FRArticleDetails = (function() {
return {
ArticleId: '645388'
};
})();
var FRArticleRecaptchaSettings = (function() {
return {
RecaptchaSiteKey: '6LdG3i0UAAAAAOC4qUh35ubHgJotEHp_STXHgr_v'
};
})();
</script>
<script src="./Datasheet1_files/addthis_widget.js.download"></script><div id="_atssh" style="visibility: hidden; height: 1px; width: 1px; position: absolute; top: -9999px; z-index: 100000;"><iframe id="_atssh11" title="AddThis utility frame" src="./Datasheet1_files/sh.f48a1a04fe8dbf021b4cda1d.html" style="height: 1px; width: 1px; position: absolute; top: 0px; z-index: 100000; border: 0px; left: 0…	.at-rounded-element .at-icon-wrapper{border-radius:12%}.at-circular	.at-circular-element .at-icon-wrapper{border-radius:50%}.addthis_32x32_style .at-icon{width:2pc;height:2pc}.addthis_24x24_style .at-icon{width:24px;height:24px}.addthis_20x20_style .at-icon{width:20px;height:20px}.addthis_16x16_style .at-icon{width:1pc;height:1pc}#at16lb{display:none;position:absolute;top:0;left:0;width:100%;height:100%;z-index:1001;background-color:#000;opacity:.001}#at_complete	#at_error	#at_share	#at_success{position:static!important}.at15dn{display:none}#at15s	#at16p	#at16p form input	#at16p label	#at16p textarea	#at_share .at_item{font-family:arial	helvetica	tahoma	verdana	sans-serif!important;font-size:9pt!important;outline-style:none;outline-width:0;line-height:1em}* html #at15s.mmborder{position:absolute!important}#at15s.mmborder{position:fixed!important;width:250px!important}#at15s{background:url(data:image/png;base64	iVBORw0KGgoAAAANSUhEUgAAAAoAAAAKCAYAAACNMs+9AAAAGXRFWHRTb2Z0d2FyZQBBZG9iZSBJbWFnZVJlYWR5ccllPAAAABtJREFUeNpiZGBgaGAgAjAxEAlGFVJHIUCAAQDcngCUgqGMqwAAAABJRU5ErkJggg==);float:none;line-height:1em;margin:0;overflow:visible;padding:5px;text-align:left;position:absolute}#at15s a	#at15s span{outline:0;direction:ltr;text-transform:none}#at15s .at-label{margin-left:5px}#at15s .at-icon-wrapper{width:1pc;height:1pc;vertical-align:middle}#at15s .at-icon{width:1pc;height:1pc}.at4-icon{display:inline-block;background-repeat:no-repeat;background-position:top left;margin:0;overflow:hidden;cursor:pointer}.addthis_16x16_style .at4-icon	.addthis_default_style .at4-icon	.at4-icon	.at-16x16{width:1pc;height:1pc;line-height:1pc;background-size:1pc!important}.addthis_32x32_style .at4-icon	.at-32x32{width:2pc;height:2pc;line-height:2pc;background-size:2pc!important}.addthis_24x24_style .at4-icon	.at-24x24{width:24px;height:24px;line-height:24px;background-size:24px!important}.addthis_20x20_style .at4-icon	.at-20x20{width:20px;height:20px;line-height:20px;background-size:20px!important}.at4-icon.circular	.circular .at4-icon	.circular.aticon{border-radius:50%}.at4-icon.rounded	.rounded .at4-icon{border-radius:4px}.at4-icon-left{float:left}#at15s .at4-icon{text-indent:20px;padding:0;overflow:visible;white-space:nowrap;background-size:1pc;width:1pc;height:1pc;background-position:top left;display:inline-block;line-height:1pc}.addthis_vertical_style .at4-icon	.at4-follow-container .at4-icon{margin-right:5px}html>body #at15s{width:250px!important}#at15s.atm{background:none!important;padding:0!important;width:10pc!important}#at15s_inner{background:#fff;border:1px solid #fff;margin:0}#at15s_head{position:relative;background:#f2f2f2;padding:4px;cursor:default;border-bottom:1px solid #e5e5e5}.at15s_head_success{background:#cafd99!important;border-bottom:1p…	.at15s_head_success span{color:#000!important;text-decoration:none}#at15s_brand	#at15sptx	#at16_brand{position:absolute}#at15s_brand{top:4px;right:4px}.at15s_brandx{right:20px!important}a#at15sptx{top:4px;right:4px;text-decoration:none;color:#4c4c4c;font-weight:700}#at15sptx:hover{text-decoration:underline}#at16_brand{top:5px;right:30px;cursor:default}#at_hover{padding:4px}#at_hover .at_item	#at_share .at_item{background:#fff!important;float:left!important;color:#4c4c4c!important}#at_share .at_item .at-icon-wrapper{margin-right:5px}#at_hover .at_bold{font-weight:700;color:#000!important}#at_hover .at_item{width:7pc!important;padding:2px 3px!important;margin:1px;text-decoration:none!important}#at_hover .at_item.athov	#at_hover .at_item:focus	#at_hover .at_item:hover{margin:0!important}#at_hover .at_item.athov	#at_hover .at_item:focus	#at_hover .at_item:hover	#at_share .at_item.athov	#at_share .at_item:hover{background:#f2f2f2!important;border:1px solid #e5e5e5;color:#000!important;text-decoration:none}.ipad #at_hover .at_item:focus{background:#fff!important;border:1px solid #fff}.at15t{display:block!important;height:1pc!important;line-height:1pc!important;padding-left:20px!important;background-position:0 0;text-align:left}.addthis_button	.at15t{cursor:pointer}.addthis_toolbox a.at300b	.addthis_toolbox a.at300m{width:auto}.addthis_toolbox a{margin-bottom:5px;line-height:initial}.addthis_toolbox.addthis_vertical_style{width:200px}.addthis_button_facebook_like .fb_iframe_widget{line-height:100%}.addthis_button_facebook_like iframe.fb_iframe_widget_lift{max-width:none}.addthis_toolbox a.addthis_button_counter	.addthis_toolbox a.addthis_button_facebook_like	.addthis_toolbox a.addthis_button_facebook_send	.addthis_toolbox a.addthis_button_facebook_share	.addthis_toolbox a.addthis_button_foursquare	.addthis_toolbox a.addthis_button_linkedin_counter	.addthis_toolbox a.addthis_button_pinterest_pinit	.addthis_toolbox a.addthis_button_tweet{display:inline-block}.addthis_toolbox span.addthis_follow_label{display:none}.addthis_toolbox.addthis_vertical_style span.addthis_follow_label{display:block;white-space:nowrap}.addthis_toolbox.addthis_vertical_style a{display:block}.addthis_toolbox.addthis_vertical_style.addthis_32x32_style a{line-height:2pc;height:2pc}.addthis_toolbox.addthis_vertical_styl…	.addthis_toolbox.addthis_pill_combo_style a{float:left}.addthis_toolbox.addthis_pill_combo_style a.addthis_button_tweet{margin-top:-2px}.addthis_toolbox.addthis_pill_combo_style .addthis_button_compact .at15t_compact{margin-right:4px}.addthis_default_style .addthis_separator{margin:0 5px;display:inline}div.atclear{clear:both}.addthis_default_style .addthis_separator	.addthis_default_style .at4-icon	.addthis_default_style .at300b	.addthis_default_style .at300bo
<script language="javascript">
var addthis_config = addthis_config || {};
addthis_config.data_track_addressbar = false;
addthis_config.data_track_clickback = false;
</script>
<!--[if lt IE 9]>
<script src="https://oss.maxcdn.com/libs/html5shiv/3.7.0/html5shiv.js"></script>
<script src="https://oss.maxcdn.com/libs/respond.js/1.4.2/respond.min.js"></script>
<![endif]-->
<script src="./Datasheet1_files/js"></script>
<script src="./Datasheet1_files/frontiers.markerclusterer.js.download"></script>
<link href="./Datasheet1_files/font-awesome.css" rel="stylesheet">
<link href="./Datasheet1_files/museo-sans.css" rel="stylesheet">
<link href="./Datasheet1_files/museo-slab.css" rel="stylesheet">
<link href="./Datasheet1_files/open-sans.css" rel="stylesheet">
<link href="./Datasheet1_files/app" rel="stylesheet">
<style type="text/css"> .journal-molecular-biosciences {
background: #fff url('https://3718aeafc638f96f5bd6-d4a9ca15fc46ba40e71f94dec0aad28c.ssl.cf1.rackcdn.com/journal-molecular-biosciences.png') no-repeat 122% -120px;
background-size: 41%;
}
/* Displays/Screens (e.g. 19" WS @ 1440x900) --------------- */ @media only screen and (max-width: 1649px) {
.journal-molecular-biosciences {
background: #fff url('https://3718aeafc638f96f5bd6-d4a9ca15fc46ba40e71f94dec0aad28c.ssl.cf1.rackcdn.com/journal-molecular-biosciences.png') no-repeat 130% -120px;
background-size: 53%;
}}
/* Displays/Screens (e.g. MacBook @ 1280x800) -------------- */
@media only screen and (max-width: 1409px) {
.journal-molecular-biosciences {
background: #fff url('https://3718aeafc638f96f5bd6-d4a9ca15fc46ba40e71f94dec0aad28c.ssl.cf1.rackcdn.com/journal-molecular-biosciences.png') no-repeat 130% -120px;
background-size: 53%;
}}
/* Large Devices	Wide Screens --------- */ @media only screen and (max-width : 1250px) {
.journal-molecular-biosciences {
background: #fff url('https://3718aeafc638f96f5bd6-d4a9ca15fc46ba40e71f94dec0aad28c.ssl.cf1.rackcdn.com/journal-molecular-biosciences.png') no-repeat 130% -120px;
background-size: 53%;
}}
/* Medium Devices	Desktops ---------- */ @media only screen and (max-width : 992px) {
.journal-molecular-biosciences {
background: #fff url('https://3718aeafc638f96f5bd6-d4a9ca15fc46ba40e71f94dec0aad28c.ssl.cf1.rackcdn.com/journal-molecular-biosciences.png') no-repeat 130% -120px;
background-size: 53%;
}}
/* Small Devices	Tablets ------------ */ @media only screen and (max-width : 768px) {
.journal-molecular-biosciences {
background: #fff url('https://3718aeafc638f96f5bd6-d4a9ca15fc46ba40e71f94dec0aad28c.ssl.cf1.rackcdn.com/journal-molecular-biosciences.png') no-repeat 140% -120px;
background-size: 65%;
}}
/* Small Devices	Tablets --------- */ @media only screen and (max-width : 640px) {
.journal-molecular-biosciences {
background: #fff url('https://3718aeafc638f96f5bd6-d4a9ca15fc46ba40e71f94dec0aad28c.ssl.cf1.rackcdn.com/journal-molecular-biosciences.png') no-repeat 170% -60px;
background-size: 73%;
}}
/* Extra Small Devices	Phones----------- */ @media only screen and (max-width : 480px) {
.journal-molecular-biosciences {
background: #fff url('https://3718aeafc638f96f5bd6-d4a9ca15fc46ba40e71f94dec0aad28c.ssl.cf1.rackcdn.com/journal-molecular-biosciences.png') no-repeat 170% -20px;
background-size: 73%;
}}
/* Custom	iPhone Retina -------*/ @media only screen and (max-width : 320px) {
.journal-molecular-biosciences {
background: #fff url('https://3718aeafc638f96f5bd6-d4a9ca15fc46ba40e71f94dec0aad28c.ssl.cf1.rackcdn.com/journal-molecular-biosciences.png') no-repeat 250% 0px;
background-size: 93%;
}} </style>
<style type="text/css">@import url(https://9d0dd7a648345f19af83-877d2ecaf11b88d5e17327c758e17ef6.ssl.cf2.rackcdn.com/museo-sans-1.0.1/css/museo-sans.css);</style><style type="text/css">@keyframes rotate{0%{transform:rotate(0deg)}100%{transform:rotate(1080deg)}}@media only screen and (max-width: 768px){.hidden-sm{display:none}}body{padding-top:51px}.ibar__wrapper{display:flex;justify-content:space…	0	0	0.2);font-family:'MuseoSans'	Helvetica	Arial	sans-serif;height:51px;position:fixed;top:0;width:100%;box-sizing:border-box;z-index:1030;color:#020202}@media only screen and (max-width: 1024px){.ibar__wrapper{background-size:24px 28px;margin-left:12px;border:transparent;box-shadow:none;padding:0;margin:0}}.ibar__limitWrapper{display:flex;align-items:center;flex-shrink:0}@media only screen and (max-width: 1024px){.ibar__limitWrapper{width:100%…	0	0	0.2)}}.ibar__logo{min-width:31px;height:31px}.ibar__logo__img{height:100%}@media only screen and (max-width: 1024px){.ibar__logo{background-size:24px 28px;margin-left:9px}}.ibar__noLogo{padding:6px 0 6px 2px;position:relative;text-decoration:none;text-transform:uppercase;font-family:"MuseoSans"	Helvetica	Arial	sans-serif;font-size:12px;line-height:16px;font-weight:300;color:#020202}@media only screen and (min-width: 1025px){.ibar__noLogo:hover	.ibar__noLogo:active	.ibar__noLogo:visited	.ibar__noLogo:focus{padding:6px 0 6px 2px}}@media only screen and (max-width: 1024px){.ibar__noLogo{padding-left:12px;padding-right:6px}}.ibar__user{display:flex;align-items:center;flex-shrink:0}@media only screen and (max-width: 1024px){.ibar__user{display:block;text-align:center;padding-bottom:10px;margin-bottom:10px;width:100%}}.ibar__user__profile-pic{width:32px;height:32px}.ibar__user__profi…	Helvetica	Arial	sans-serif;font-size:12px;line-height:32px;font-weight:300;color:#020202}@media only screen and (max-width: 1024px){.ibar__user__link{line-height:38px;margin:0;padding:0 20px}}.ibar__user__link--user-name{text-transform:none;font-family:"MuseoSans"	Helvetica	Arial	sans-serif;font-size:14px;line-height:32px;font-weight:500;color:#020202}@media only screen and (max-width: 1024px){.ibar__user__link--user-name{padding:0 20px;margin-bottom:10px;width:100%}}.ibar__user__link__forward-slash{margin:0 4px}.ibar__user__link--mobile{padding:0 10px}@media only screen and (max-width: 1024px){.ibar__user__link-item{color:#020202}}.ibar__user__nav-dropdown{position:relat…	Helvetica	Arial	sans-serif;font-size:12px;line-height:32px;font-weight:500;color:#020202}.ibar__user__dropdown-trigger:after{content:'';background:url(data:image/svg+xml;base64	PHN2ZyB4bWxucz0iaHR0cDovL3d3dy53My5vcmcvMjAwMC9zdmciIHdpZHRoPSIxMCIgaGVpZ2h0PSI2IiB2aWV3Qm94PSIwIDAgMTAgNiI+PHBhdGggZmlsbD0iIzk5OTk5OSIgc3R5bGU9ImZpbGwtcnVsZTogZXZlbm9kZCIgZD0iTTUuNTUyLDUuODA5TDkuODE2LDEuMTk1QTAuNjcsMC42NywwLDAsMCw4Ljg2My4yNTNMNS4wNjksNC4zNlEzLjEwNiwyLjMsMS4xNC4yMzNhMC42NywwLjY3LDAsMCwwLS45NTIuOTQyTDQuNiw1LjgwOUEwLjY4MSwwLjY4MSwwLDAsMCw1LjU1Miw1LjgwOVoiLz48L3N2Zz4=) no-repeat 50%…	PHN2ZyB4bWxucz0iaHR0cDovL3d3dy53My5vcmcvMjAwMC9zdmciIHdpZHRoPSIxMCIgaGVpZ2h0PSI2IiB2aWV3Qm94PSIwIDAgMTAgNiI+PHBhdGggZmlsbD0iIzk5OTk5OSIgc3R5bGU9ImZpbGwtcnVsZTogZXZlbm9kZCIgZD0iTTUuNTUyLDUuODA5TDkuODE2LDEuMTk1QTAuNjcsMC42NywwLDAsMCw4Ljg2My4yNTNMNS4wNjksNC4zNlEzLjEwNiwyLjMsMS4xNC4yMzNhMC42NywwLjY3LDAsMCwwLS45NTIuOTQyTDQuNiw1LjgwOUEwLjY4MSwwLjY4MSwwLDAsMCw1LjU1Miw1LjgwOVoiLz48L3N2Zz4=) no-repeat 50%…	0.68	0	1.71)}}.ibar__user__dropdown-trigger--product{padding:0}@media only screen and (max-width: 1024px){.ibar__user__dropdown-trigger--product:before{display:none}.ibar__user__dropdown-trigger--product:after{display:block}}@media only screen and (max-width: 1024px){.ibar__user__dropdown-trigger--invert-arrow-on-mobile:before{transform:rotate(0deg)}}.ibar__user__dropdown-trigger--not-arrow:after{displa…	0	0	0.175)}.ibar__user__dropdown-list::-webkit-scrollbar{background:#e0e0e0;-webkit-appearance:none;width:10px;height:10px}.ibar__user__dropdown-list::-webkit-scrollbar-thumb{border-radius:0;background-color:#bababa}@media only screen and (max-width: 1024px){.ibar__user__dropdown-list{max-height:initial;left:0}}.ibar__user__dropdown-list--more{top:45px}.ibar__user__dropdown-list--more .ibar__nav-list…	Helvetica	Arial	sans-serif;font-size:12px;line-height:28px;font-weight:300;color:#020202}.ibar__user__dropdown-list--more .ibar__nav-list__item a{display:block;width:100%}.ibar__user__dropdown-list--more .ibar__nav-list__item:hover{background-color:#F1F1F1}.ibar__user__dropdown-list--more .ibar__nav-list__link{display:block;padding:0;position:relative;text-decoration:none;text-transform:uppercase;font-family:"Mu…	Helvetica	Arial	sans-serif;font-family:"MuseoSans"	Helvetica	Arial	sans-serif;font-size:12px;line-height:28px;font-weight:300;color:#020202}.ibar__user__dropdown-list--more .ibar__nav-list__link:hover	.ibar__user__dropdown-list--more .ibar__nav-list__link:active{padding:0}@media only screen and (max-width: 1024px){.ibar__user__dropdown-list--user-links{opacity:1;position:relative;text-align:left;transform:initial;top:auto;pointer-events:all;border:0;border-top:1px solid #e0e0e0;box-shadow:none;margin-top:7px;margin-bottom:30px}}@media only screen and (max-width: 1024px){.ibar__user__dropdown-l…	0.74	0.15	1);opacity:1}}.ibar__user__dropdown-list--visible{opacity:1;pointer-events:all}@media only screen and (min-width: 1025px){.ibar__user__dropdown-list--align-right{right:0;left:auto}}.ibar__user__dropdown-list--user{min-width:300px}.ibar__user__dropdown-link{font-family:"MuseoSans"	Helvetica	Arial	sans-serif;font-size:12px;line-height:28px;font-weight:300;color:#020202;padding:0px 10px;display:block;cursor:pointer;box-sizing:border-box}.ibar__user__dropdown-link:hover	.ibar__user__dropdown-link:active
</style><style type="text/css">.ibar__nav-list__link--active{color:#00a0d2}.ibar__nav-list__link--active:hover	.ibar__nav-list__link--active:active	.ibar__nav-list__link--active:visited	.ibar__nav-list__link--active:focus{color:#00a0d2}@media only screen and (max-width: 1024px){.ibar__nav-list__link--active{background-color:#CCF3FF}}.ibar__nav-list__link--active:before{background-color:#00a0d2}.ibar__nav-list__link--active:after{background-color:#00a0d2}.ibar__submit{background:#00a0d2}.ibar__submit:hover{background:#0085ae}
</style><script id="altmetric-embed-js" src="./Datasheet1_files/altmetric_badges-dae2a658e53c442cd84f4390def938db5569f7911cfa1aa78d8970054ec2f48f.js.download"></script><style type="text/css">.MathJax_Hover_Frame {border-radius: .25em; -webkit-border-radius: .25em; -moz-border-radius: .25em; -khtml-border-radius: .25em; box-shadow: 0px 0px 15px #83A; -webkit-box-shadow: 0px 0px 15px #83A; -moz-box…
.MathJax_Menu_Button .MathJax_Hover_Arrow {position: absolute; cursor: pointer; display: inline-block; border: 2px solid #AAA; border-radius: 4px; -webkit-border-radius: 4px; -moz-border-radius: 4px; -khtml-border-radius: 4px; font-family: 'Courier New'	Courier; font-size: 9px; color: #F0F0F0}
.MathJax_Menu_Button .MathJax_Hover_Arrow span {display: block; background-color: #AAA; border: 1px solid; border-radius: 3px; line-height: 0; padding: 4px}
.MathJax_Hover_Arrow:hover {color: white!important; border: 2px solid #CCC!important}
.MathJax_Hover_Arrow:hover span {background-color: #CCC!important}
</style><style type="text/css">#MathJax_About {position: fixed; left: 50%; width: auto; text-align: center; border: 3px outset; padding: 1em 2em; background-color: #DDDDDD; color: black; cursor: default; font-family: message-box; font-size: 120%; font-style: normal; text-indent: 0; text-transform: none; line-height: normal; letter-spacing: normal; word-spacing: normal; word-wrap: normal; white-sp…	OffY=2	Color='gray'	Positive='true')}
#MathJax_About.MathJax_MousePost {outline: none}
.MathJax_Menu {position: absolute; background-color: white; color: black; width: auto; padding: 2px; border: 1px solid #CCCCCC; margin: 0; cursor: default; font: menu; text-align: left; text-indent: 0; text-transform: none; line-height: normal; letter-spacing: normal; word-spacing: normal; word-wrap: normal; white-space: nowrap; float: none; z-index: 201; box-shadow: 0px 10px 20px #808080; -webki…	OffY=2	Color='gray'	Positive='true')}
.MathJax_MenuItem {padding: 2px 2em; background: transparent}
.MathJax_MenuArrow {position: absolute; right: .5em; padding-top: .25em; color: #666666; font-size: .75em}
.MathJax_MenuActive .MathJax_MenuArrow {color: white}
.MathJax_MenuArrow.RTL {left: .5em; right: auto}
.MathJax_MenuCheck {position: absolute; left: .7em}
.MathJax_MenuCheck.RTL {right: .7em; left: auto}
.MathJax_MenuRadioCheck {position: absolute; left: 1em}
.MathJax_MenuRadioCheck.RTL {right: 1em; left: auto}
.MathJax_MenuLabel {padding: 2px 2em 4px 1.33em; font-style: italic}
.MathJax_MenuRule {border-top: 1px solid #CCCCCC; margin: 4px 1px 0px}
.MathJax_MenuDisabled {color: GrayText}
.MathJax_MenuActive {background-color: Highlight; color: HighlightText}
.MathJax_MenuDisabled:focus	.MathJax_MenuLabel:focus {background-color: #E8E8E8}
.MathJax_ContextMenu:focus {outline: none}
.MathJax_ContextMenu .MathJax_MenuItem:focus {outline: none}
#MathJax_AboutClose {top: .2em; right: .2em}
.MathJax_Menu .MathJax_MenuClose {top: -10px; left: -10px}
.MathJax_MenuClose {position: absolute; cursor: pointer; display: inline-block; border: 2px solid #AAA; border-radius: 18px; -webkit-border-radius: 18px; -moz-border-radius: 18px; -khtml-border-radius: 18px; font-family: 'Courier New'	Courier; font-size: 24px; color: #F0F0F0}
.MathJax_MenuClose span {display: block; background-color: #AAA; border: 1.5px solid; border-radius: 18px; -webkit-border-radius: 18px; -moz-border-radius: 18px; -khtml-border-radius: 18px; line-height: 0; padding: 8px 0 6px}
.MathJax_MenuClose:hover {color: white!important; border: 2px solid #CCC!important}
.MathJax_MenuClose:hover span {background-color: #CCC!important}
.MathJax_MenuClose:hover:focus {outline: none}
</style><style type="text/css">.MathJax_Preview .MJXf-math {color: inherit!important}
</style><style type="text/css">.MJX_Assistive_MathML {position: absolute!important; top: 0; left: 0; clip: rect(1px	1px	1px	1px); padding: 1px 0 0 0!important; border: 0!important; height: 1px!important; width: 1px!important; overflow: hidden!important; display: block!important; -webkit-touch-callout: none; -webkit-user-select: none; -khtml-user-select: none; -moz-user-select: none; -ms-user-select: none; user-select: none}
.MJX_Assistive_MathML.MJX_Assistive_MathML_Block {width: 100%!important}
</style><style type="text/css">#MathJax_Zoom {position: absolute; background-color: #F0F0F0; overflow: auto; display: block; z-index: 301; padding: .5em; border: 1px solid black; margin: 0; font-weight: normal; font-style: normal; text-align: left; text-indent: 0; text-transform: none; line-height: normal; letter-spacing: normal; word-spacing: normal; word-wrap: normal; white-space: nowrap; float…	OffY=2	Color='gray'	Positive='true')}
#MathJax_ZoomOverlay {position: absolute; left: 0; top: 0; z-index: 300; display: inline-block; width: 100%; height: 100%; border: 0; padding: 0; margin: 0; background-color: white; opacity: 0; filter: alpha(opacity=0)}
#MathJax_ZoomFrame {position: relative; display: inline-block; height: 0; width: 0}
#MathJax_ZoomEventTrap {position: absolute; left: 0; top: 0; z-index: 302; display: inline-block; border: 0; padding: 0; margin: 0; background-color: white; opacity: 0; filter: alpha(opacity=0)}
</style><style type="text/css">.MathJax_Preview {color: #888}
#MathJax_Message {position: fixed; left: 1em; bottom: 1.5em; background-color: #E6E6E6; border: 1px solid #959595; margin: 0px; padding: 2px 8px; z-index: 102; color: black; font-size: 80%; width: auto; white-space: nowrap}
#MathJax_MSIE_Frame {position: absolute; top: 0; left: 0; width: 0px; z-index: 101; border: 0px; margin: 0px; padding: 0px}
.MathJax_Error {color: #CC0000; font-style: italic}
</style><style type="text/css">.MJXp-script {font-size: .8em}
.MJXp-right {-webkit-transform-origin: right; -moz-transform-origin: right; -ms-transform-origin: right; -o-transform-origin: right; transform-origin: right}
.MJXp-bold {font-weight: bold}
.MJXp-italic {font-style: italic}
.MJXp-scr {font-family: MathJax_Script	'Times New Roman'	Times	STIXGeneral	serif}
.MJXp-frak {font-family: MathJax_Fraktur	'Times New Roman'	Times	STIXGeneral	serif}
.MJXp-sf {font-family: MathJax_SansSerif	'Times New Roman'	Times	STIXGeneral	serif}
.MJXp-cal {font-family: MathJax_Caligraphic	'Times New Roman'	Times	STIXGeneral	serif}
.MJXp-mono {font-family: MathJax_Typewriter	'Times New Roman'	Times	STIXGeneral	serif}
.MJXp-largeop {font-size: 150%}
.MJXp-largeop.MJXp-int {vertical-align: -.2em}
.MJXp-math {display: inline-block; line-height: 1.2; text-indent: 0; font-family: 'Times New Roman'	Times	STIXGeneral	serif; white-space: nowrap; border-collapse: collapse}
.MJXp-display {display: block; text-align: center; margin: 1em 0}
.MJXp-math span {display: inline-block}
.MJXp-box {display: block!important; text-align: center}
.MJXp-box:after {content: " "}
.MJXp-rule {display: block!important; margin-top: .1em}
.MJXp-char {display: block!important}
.MJXp-mo {margin: 0 .15em}
.MJXp-mfrac {margin: 0 .125em; vertical-align: .25em}
.MJXp-denom {display: inline-table!important; width: 100%}
.MJXp-denom > * {display: table-row!important}
.MJXp-surd {vertical-align: top}
.MJXp-surd > * {display: block!important}
.MJXp-script-box > * {display: table!important; height: 50%}
.MJXp-script-box > * > * {display: table-cell!important; vertical-align: top}
.MJXp-script-box > *:last-child > * {vertical-align: bottom}
.MJXp-script-box > * > * > * {display: block!important}
.MJXp-mphantom {visibility: hidden}
.MJXp-munderover {display: inline-table!important}
.MJXp-over {display: inline-block!important; text-align: center}
.MJXp-over > * {display: block!important}
.MJXp-munderover > * {display: table-row!important}
.MJXp-mtable {vertical-align: .25em; margin: 0 .125em}
.MJXp-mtable > * {display: inline-table!important; vertical-align: middle}
.MJXp-mtr {display: table-row!important}
.MJXp-mtd {display: table-cell!important; text-align: center; padding: .5em 0 0 .5em}
.MJXp-mtr > .MJXp-mtd:first-child {padding-left: 0}
.MJXp-mtr:first-child > .MJXp-mtd {padding-top: 0}
.MJXp-mlabeledtr {display: table-row!important}
.MJXp-mlabeledtr > .MJXp-mtd:first-child {padding-left: 0}
.MJXp-mlabeledtr:first-child > .MJXp-mtd {padding-top: 0}
.MJXp-merror {background-color: #FFFF88; color: #CC0000; border: 1px solid #CC0000; padding: 1px 3px; font-style: normal; font-size: 90%}
.MJXp-scale0 {-webkit-transform: scaleX(.0); -moz-transform: scaleX(.0); -ms-transform: scaleX(.0); -o-transform: scaleX(.0); transform: scaleX(.0)}
.MJXp-scale1 {-webkit-transform: scaleX(.1); -moz-transform: scaleX(.1); -ms-transform: scaleX(.1); -o-transform: scaleX(.1); transform: scaleX(.1)}
.MJXp-scale2 {-webkit-transform: scaleX(.2); -moz-transform: scaleX(.2); -ms-transform: scaleX(.2); -o-transform: scaleX(.2); transform: scaleX(.2)}
.MJXp-scale3 {-webkit-transform: scaleX(.3); -moz-transform: scaleX(.3); -ms-transform: scaleX(.3); -o-transform: scaleX(.3); transform: scaleX(.3)}
.MJXp-scale4 {-webkit-transform: scaleX(.4); -moz-transform: scaleX(.4); -ms-transform: scaleX(.4); -o-transform: scaleX(.4); transform: scaleX(.4)}
.MJXp-scale5 {-webkit-transform: scaleX(.5); -moz-transform: scaleX(.5); -ms-transform: scaleX(.5); -o-transform: scaleX(.5); transform: scaleX(.5)}
.MJXp-scale6 {-webkit-transform: scaleX(.6); -moz-transform: scaleX(.6); -ms-transform: scaleX(.6); -o-transform: scaleX(.6); transform: scaleX(.6)}
.MJXp-scale7 {-webkit-transform: scaleX(.7); -moz-transform: scaleX(.7); -ms-transform: scaleX(.7); -o-transform: scaleX(.7); transform: scaleX(.7)}
.MJXp-scale8 {-webkit-transform: scaleX(.8); -moz-transform: scaleX(.8); -ms-transform: scaleX(.8); -o-transform: scaleX(.8); transform: scaleX(.8)}
.MJXp-scale9 {-webkit-transform: scaleX(.9); -moz-transform: scaleX(.9); -ms-transform: scaleX(.9); -o-transform: scaleX(.9); transform: scaleX(.9)}
.MathJax_PHTML .noError {vertical-align: ; font-size: 90%; text-align: left; color: black; padding: 1px 3px; border: 1px solid}
</style><script src="./Datasheet1_files/f(1).txt"></script><script src="./Datasheet1_files/otBannerSdk.js.download" async="" type="text/javascript"></script><style id="onetrust-style">#onetrust-banner-sdk{-ms-text-size-adjust:100%;-webkit-text-size-adjust:100%}#onetrust-banner-sdk .onetrust-vendors-list-handler{cursor:pointer;color:#1f96db;font-size:inherit;font-weight:bold;text-decoration:none;m…	#onetrust-pc-sdk .ot-close-icon	#ot-sync-ntfy .ot-close-icon{background-image:url("data:image/svg+xml;base64	PHN2ZyB2ZXJzaW9uPSIxLjEiIHhtbG5zPSJodHRwOi8vd3d3LnczLm9yZy8yMDAwL3N2ZyIgeG1sbnM6eGxpbms9Imh0dHA6Ly93d3cudzMub3JnLzE5OTkveGxpbmsiIHg9IjBweCIgeT0iMHB4IiB3aWR0aD0iMzQ4LjMzM3B4IiBoZWlnaHQ9IjM0OC4zMzNweCIgdmlld0JveD0iMCAwIDM0OC4zMzMgMzQ4LjMzNCIgc3R5bGU9ImVuYWJsZS1iYWNrZ3JvdW5kOm5ldyAwIDAgMzQ4LjMzMyAzNDguMzM0OyIgeG1sOnNwYWNlPSJwcmVzZXJ2ZSI+PGc+PHBhdGggZmlsbD0iIzU2NTY1NiIgZD0iTTMzNi41NTksNjguNjExTDIzMS4…	#onetrust-banner-sdk .ot-pc-footer-logo a	#onetrust-pc-sdk .powered-by-logo	#onetrust-pc-sdk .ot-pc-footer-logo a	#ot-sync-ntfy .powered-by-logo	#ot-sync-ntfy .ot-pc-footer-logo a{background-size:contain;background-repeat:no-repeat;background-position:center;height:25px;width:152px;display:block}#onetrust-banner-sdk h3 *	#onetrust-banner-sdk h4 *	#onetrust-banner-sdk h6 *	#onetrust-banner-sdk button *	#onetrust-banner-sdk a[data-parent-id] *	#onetrust-pc-sdk h3 *	#onetrust-pc-sdk h4 *	#onetrust-pc-sdk h6 *	#onetrust-pc-sdk button *	#onetrust-pc-sdk a[data-parent-id] *	#ot-sync-ntfy h3 *	#ot-sync-ntfy h4 *	#ot-sync-ntfy h6 *	#ot-sync-ntfy button *	#ot-sync-ntfy a[data-parent-id] *{font-size:inherit;font-weight:inherit;color:inherit}#onetrust-banner-sdk .ot-hide	#onetrust-pc-sdk .ot-hide	#ot-sync-ntfy .ot-hide{display:none !important}#onetrust-pc-sdk .ot-sdk-row .ot-sdk-column{padding:0}#onetrust-pc-sdk .ot-sdk-container{padding-right:0}#onetrust-pc-sdk .ot-sdk-row{flex-direction:initial;width:100%}#onetrust-pc-sdk [type="checkbox"]:checked	#onetrust-pc-sdk [type="checkbox"]:not(:checked){pointer-events:initial}#onetrust-pc-sdk [type="checkbox"]:disabled+label::before	#onetrust-pc-sdk [type="checkbox"]:disabled+label:after	#onetrust-pc-sdk [type="checkbox"]:disabled+label{pointer-events:none;opacity:0.7}#onetrust-pc-sdk #vendor-list-content{transform:translate3d(0	0	0)}#onetrust-pc-sdk li input[type="checkbox"]{z-index:1}#onetrust-pc-sdk li .ot-checkbox label{z-index:2}#onetrust-pc-sdk li .ot-checkbox input[type="checkbox"]{height:auto;width:auto}#onetrust-pc-sdk li .host-title a	#onetrust-pc-sdk li .ot-host-name a	#onetrust-pc-sdk li .accordion-text	#onetrust-pc-sdk li .ot-acc-txt{z-index:2;position:relative}#onetrust-pc-sdk input{margin:3px 0.1ex}#onetrust-pc-sdk .toggle-always-active{opacity:0.6;cursor:default}#onetrust-pc-sdk .pc-logo	#onetrust-pc-sdk .ot-pc-logo{height:60px;width:180px;background-position:center;background-size:contain;background-repeat:no-repeat}#onetrust-pc-sdk .ot-tooltip .ot-tooltiptext{visibility:hidden;width:120px;background-color:#555;color:#fff;text-align:center;padding:5px 0;border-radius:6px;position:absolute;z-index:1;bottom:125%;left:50%;margin-left:-60px;opacity:0;transition:opacity 0.3s}#onetrus…	#onetrust-pc-sdk .ot-scrn-rdr	.ot-sdk-cookie-policy .screen-reader-only	.ot-sdk-cookie-policy .ot-scrn-rdr{border:0;clip:rect(0 0 0 0);height:1px;margin:-1px;overflow:hidden;padding:0;position:absolute;width:1px}#onetrust-pc-sdk.ot-fade-in	.onetrust-pc-dark-filter.ot-fade-in{animation-name:onetrust-fade-in;animation-duration:400ms;animation-timing-function:ease-in-out}#onetrust-pc-sdk.ot-hide{display:none !important}.onetrust-pc-dark-filter.ot-hide{display:none !important}#ot-sdk-btn.ot-sdk-show-settings	#ot-sdk-btn.optanon-show-settings{color:#68b631;border:1px solid #68b631;height:auto;white-space:normal;word-wrap:break-word;padding:0.8em 2em;font-size:0.8em;line-height:1.2;cursor:pointer;-moz-transition:0.1s ease;-o-transition:0.1s ease;-webkit-transition:1s ease;transition:0.1s ease}#ot-sdk-btn.ot-sdk-show-settings:hover	#ot-sdk-btn.optanon-show-settings:hover{color:#fff;background-color:#68b631}.onetrust-pc-dark-filter{background:rgba(0	0	0	0.5);z-index:2147483646;width:100%;height:100%;overflow:hidden;position:fixed;top:0;bottom:0;left:0}@keyframes onetrust-fade-in{0%{opacity:0}100%{opacity:1}}@media only screen and (min-width: 426px) and (max-width: 896px) and (orientation: landscape){#onetrust-pc-sdk p{font-size:0.75em}}#onetrust-banner-sdk .banner-option-input:focus+label{outline:1px solid #000;outline-style:auto}
#onetrust-banner-sdk	#onetrust-pc-sdk	#ot-sdk-cookie-policy	#ot-sync-ntfy{font-size:16px}#onetrust-banner-sdk *	#onetrust-banner-sdk ::after	#onetrust-banner-sdk ::before	#onetrust-pc-sdk *	#onetrust-pc-sdk ::after	#onetrust-pc-sdk ::before	#ot-sdk-cookie-policy *	#ot-sdk-cookie-policy ::after	#ot-sdk-cookie-policy ::before	#ot-sync-ntfy *	#ot-sync-ntfy ::after	#ot-sync-ntfy ::before{-webkit-box-sizing:content-box;-moz-box-sizing:content-box;box-sizing:content-box}#onetrust-banner-sdk div	#onetrust-banner-sdk span	#onetrust-banner-sdk h1	#onetrust-banner-sdk h2	#onetrust-banner-sdk h3	#onetrust-banner-sdk h4	#onetrust-banner-sdk h5	#onetrust-banner-sdk h6	#onetrust-banner-sdk p	#onetrust-banner-sdk img	#onetrust-banner-sdk svg	#onetrust-banner-sdk button	#onetrust-banner-sdk section	#onetrust-banner-sdk a	#onetrust-banner-sdk label	#onetrust-banner-sdk input	#onetrust-banner-sdk ul	#onetrust-banner-sdk li	#onetrust-banner-sdk nav	#onetrust-banner-sdk table	#onetrust-banner-sdk thead	#onetrust-banner-sdk tr	#onetrust-banner-sdk td	#onetrust-banner-sdk tbody	#onetrust-banner-sdk .ot-main-content	#onetrust-banner-sdk .ot-toggle	#onetrust-banner-sdk #ot-content	#onetrust-banner-sdk #ot-pc-content	#onetrust-banner-sdk .checkbox	#onetrust-pc-sdk div	#onetrust-pc-sdk span	#onetrust-pc-sdk h1	#onetrust-pc-sdk h2	#onetrust-pc-sdk h3	#onetrust-pc-sdk h4	#onetrust-pc-sdk h5
#onetrust-banner-sdk .ot-sdk-container	#onetrust-pc-sdk .ot-sdk-container	#ot-sdk-cookie-policy .ot-sdk-container{position:relative;width:100%;max-width:100%;margin:0 auto;padding:0 20px;box-sizing:border-box}#onetrust-banner-sdk .ot-sdk-column	#onetrust-banner-sdk .ot-sdk-columns	#onetrust-pc-sdk .ot-sdk-column	#onetrust-pc-sdk .ot-sdk-columns	#ot-sdk-cookie-policy .ot-sdk-column	#ot-sdk-cookie-policy .ot-sdk-columns{width:100%;float:left;box-sizing:border-box;padding:0;display:initial}@media (min-width: 400px){#onetrust-banner-sdk .ot-sdk-container	#onetrust-pc-sdk .ot-sdk-container	#ot-sdk-cookie-policy .ot-sdk-container{width:90%;padding:0}}@media (min-width: 550px){#onetrust-banner-sdk .ot-sdk-container	#onetrust-pc-sdk .ot-sdk-container	#ot-sdk-cookie-policy .ot-sdk-container{width:100%}#onetrust-banner-sdk .ot-sdk-column	#onetrust-banner-sdk .ot-sdk-columns	#onetrust-pc-sdk .ot-sdk-column	#onetrust-pc-sdk .ot-sdk-columns	#ot-sdk-cookie-policy .ot-sdk-column	#ot-sdk-cookie-policy .ot-sdk-columns{margin-left:4%}#onetrust-banner-sdk .ot-sdk-column:first-child	#onetrust-banner-sdk .ot-sdk-columns:first-child	#onetrust-pc-sdk .ot-sdk-column:first-child	#onetrust-pc-sdk .ot-sdk-columns:first-child	#ot-sdk-cookie-policy .ot-sdk-column:first-child	#ot-sdk-cookie-policy .ot-sdk-columns:first-child{margin-left:0}#onetrust-banner-sdk .ot-sdk-one.ot-sdk-column	#onetrust-banner-sdk .ot-sdk-one.ot-sdk-columns	#onetrust-pc-sdk .ot-sdk-one.ot-sdk-column	#onetrust-pc-sdk .ot-sdk-one.ot-sdk-columns	#ot-sdk-cookie-policy .ot-sdk-one.ot-sdk-column	#ot-sdk-cookie-policy .ot-sdk-one.ot-sdk-columns{width:4.66666666667%}#onetrust-banner-sdk .ot-sdk-two.ot-sdk-columns	#onetrust-pc-sdk .ot-sdk-two.ot-sdk-columns	#ot-sdk-cookie-policy .ot-sdk-two.ot-sdk-columns{width:13.3333333333%}#onetrust-banner-sdk .ot-sdk-three.ot-sdk-columns	#onetrust-pc-sdk .ot-sdk-three.ot-sdk-columns	#ot-sdk-cookie-policy .ot-sdk-three.ot-sdk-columns{width:22%}#onetrust-banner-sdk .ot-sdk-four.ot-sdk-columns	#onetrust-pc-sdk .ot-sdk-four.ot-sdk-columns	#ot-sdk-cookie-policy .ot-sdk-four.ot-sdk-columns{width:30.6666666667%}#onetrust-banner-sdk .ot-sdk-five.ot-sdk-columns	#onetrust-pc-sdk .ot-sdk-five.ot-sdk-columns	#ot-sdk-cookie-policy .ot-sdk-five.ot-sdk-columns{width:39.3333333333%}#onetrust-banner-sdk .ot-sdk-six.ot-sdk-columns	#onetrust-pc-sdk .ot-sdk-six.ot-sdk-columns	#ot-sdk-cookie-policy .ot-sdk-six.ot-sdk-columns{width:48%}#onetrust-banner-sdk .ot-sdk-seven.ot-sdk-columns	#onetrust-pc-sdk .ot-sdk-seven.ot-sdk-columns	#ot-sdk-cookie-policy .ot-sdk-seven.ot-sdk-columns{width:56.6666666667%}#onetrust-banner-sdk .ot-sdk-eight.ot-sdk-columns	#onetrust-pc-sdk .ot-sdk-eight.ot-sdk-columns	#ot-sdk-cookie-policy .ot-sdk-eight.ot-sdk-columns{width:65.3333333333%}#onetrust-banner-sdk .ot-sdk-nine.ot-sdk-columns	#onetrust-pc-sdk .ot-sdk-nine.ot-sdk-columns	#ot-sdk-cookie-policy .ot-sdk-nine.ot-sdk-columns{width:74%}#onetrust-banner-sdk .ot-sdk-ten.ot-sdk-columns	#onetrust-pc-sdk .ot-sdk-ten.ot-sdk-columns	#ot-sdk-cookie-policy .ot-sdk-ten.ot-sdk-columns{width:82.6666666667%}#onetrust-banner-sdk .ot-sdk-eleven.ot-sdk-columns	#onetrust-pc-sdk .ot-sdk-eleven.ot-sdk-columns	#ot-sdk-cookie-policy .ot-sdk-eleven.ot-sdk-columns{width:91.3333333333%}#onetrust-banner-sdk .ot-sdk-twelve.ot-sdk-columns	#onetrust-pc-sdk .ot-sdk-twelve.ot-sdk-columns	#ot-sdk-cookie-policy .ot-sdk-twelve.ot-sdk-columns{width:100%;margin-left:0}#onetrust-banner-sdk .ot-sdk-one-third.ot-sdk-column	#onetrust-pc-sdk .ot-sdk-one-third.ot-sdk-column
#onetrust-banner-sdk{box-shadow:0 0 18px rgba(0	0	0	.2)}#onetrust-banner-sdk.otFlat{position:fixed;z-index:2147483645;bottom:0;right:0;left:0;background-color:#fff;max-height:90%;overflow-x:hidden;overflow-y:auto}#onetrust-banner-sdk>.ot-sdk-container{overflow:hidden}#onetrust-banner-sdk::-webkit-scrollbar{width:11px}#onetrust-banner-sdk::-webkit-scrollbar-thumb{border-radius:10px;background:#c1c1c1}#onetrust-banner-sdk{scrollbar-arrow-color:#c1c1…	#onetrust-banner-sdk #onetrust-policy-text{color:dimgray;float:left}#onetrust-banner-sdk #onetrust-button-group-parent{min-height:1px;text-align:center}#onetrust-banner-sdk #onetrust-button-group{display:inline-block}#onetrust-banner-sdk #onetrust-accept-btn-handler	#onetrust-banner-sdk #onetrust-reject-all-handler	#onetrust-banner-sdk #onetrust-pc-btn-handler{background-color:#68b631;color:#fff;border-color:#68b631;margin-right:1em;min-width:125px;height:auto;white-space:normal;word-break:break-word;word-wrap:break-word;padding:12px 10px;line-height:1.2;font-size:.813em;font-weight:600}#onetrust-banner-sdk #onetrust-pc-btn-handler.cookie-setting-link{background-color:#fff;border:none;color:#68b631;text-dec…	-50%);position:absolute;padding:0}#onetrust-banner-sdk .banner_logo{display:none}#onetrust-banner-sdk .ot-b-addl-desc{clear:both;float:left;display:block}#onetrust-banner-sdk #banner-options{float:left;display:table;margin-right:0;margin-left:1em;width:calc(100% - 1em)}#onetrust-banner-sdk .banner-option-input{cursor:pointer;width:auto;height:auto;border:none;padding:0;padding-right:3px;margin:0 …	#onetrust-banner-sdk .banner-option-details{transition:all 300ms ease-in 0s;-webkit-transition:all 300ms ease-in 0s;-moz-transition:all 300ms ease-in 0s;-o-transition:all 300ms ease-in 0s}#onetrust-banner-sdk .ot-dpd-container{float:left}#onetrust-banner-sdk .ot-dpd-title{margin-bottom:10px}#onetrust-banner-sdk .ot-dpd-title	#onetrust-banner-sdk .ot-dpd-desc{font-size:.88em;line-height:1.4;color:dimgray}#onetrust-banner-sdk .ot-dpd-title *	#onetrust-banner-sdk .ot-dpd-desc *{font-size:inherit;line-height:inherit}#onetrust-banner-sdk.ot-iab-2 #onetrust-policy-text *{margin-bottom:0}#onetrust-banner-sdk.ot-iab-2 .onetrust-vendors-list-handler{display:block;margin-left:0;margin-top:5px;clear:both;margin-bottom:0;padding:0;border:0;height:auto;width:auto}#onetrust-banner-sdk.ot-iab-2 #onetrust-button-group button{display:block}#onetrus…	#onetrust-banner-sdk .ot-dpd-desc	#onetrust-banner-sdk .ot-b-addl-desc{font-size:.813em;line-height:1.5}#onetrust-banner-sdk .ot-dpd-desc{margin-bottom:10px}#onetrust-banner-sdk .ot-dpd-desc>.ot-b-addl-desc{margin-top:10px;margin-bottom:10px;font-size:1em}@media only screen and (max-width: 425px){#onetrust-banner-sdk #onetrust-policy{margin-left:0}#onetrust-banner-sdk .ot-hide-small{display:none}#onetrust-banner-sdk #onetrust-but…	#onetrust-banner-sdk #onetrust-reject-all-handler	#onetrust-banner-sdk #onetrust-pc-btn-handler{width:100%}#onetrust-banner-sdk .onetrust-close-btn-ui{margin:-10px -10px 0 0;float:right;padding:0}#onetrust-banner-sdk #onetrust-close-btn-container-mobile	#onetrust-banner-sdk #onetrust-policy-title{display:inline;float:none}#onetrust-banner-sdk #banner-options{margin:0;padding:0;width:100%}}@media only screen and (min-width: 426px)and (max-width: 896px){#onetrust-banner-sdk #onetrust-policy{margin-left:1em;margin-right:1em}#onetrust-banner-sdk .onetrust-close-btn-ui.onetrust-lg{top:25px;right:-15px}#onetrust-banner-sdk:not(.ot-iab-2) #onetrust-gro…	#onetrust-banner-sdk .has-reject-all-button #onetrust-accept-btn-handler{float:right}#onetrust-banner-sdk .has-reject-all-button #onetrust-button-group{width:calc(100% - 2em);margin-right:0}#onetrust-banner-sdk .has-reject-all-button #onetrust-pc-btn-handler.cookie-setting-link{padding-left:0px;text-align:left}#onetrust-banner-sdk.ot-buttons-fw .ot-sdk-three button{width:100%;text-align:center}#o…	#onetrust-banner-sdk.ot-iab-2 #onetrust-policy	#onetrust-banner-sdk.ot-iab-2 .banner-option{width:100%}}@media only screen and (min-width: 769px){#onetrust-banner-sdk .ot-hide-large{display:none}#onetrust-banner-sdk #onetrust-button-group{margin-right:30%}#onetrust-banner-sdk #banner-options{margin-left:2em;margin-right:5em;margin-bottom:1.25em;width:calc(100% - 7em)}}@media only screen and (min-width: 897px)and (max-width: 1023px){#onetrust-…	#onetrust-banner-sdk.ot-iab-2 :not(.ot-dpd-desc)>.ot-b-addl-desc{margin-bottom:1em;width:50%;border-right:1px solid #d8d8d8;padding-right:1rem}#onetrust-banner-sdk.ot-iab-2 #onetrust-policy-text{margin-bottom:0;padding-bottom:1em}#onetrust-banner-sdk.ot-iab-2 :not(.ot-dpd-desc)>.ot-b-addl-desc{margin-bottom:0;padding-bottom:1em}#onetrust-banner-sdk.ot-iab-2 .ot-dpd-container{width:45%;padding-lef…	#onetrust-banner-sdk #onetrust-reject-all-handler	#onetrust-banner-sdk #onetrust-pc-btn-handler{margin-top:1em}}@media only screen and (min-width: 890px){#onetrust-banner-sdk.ot-buttons-fw:not(.ot-iab-2) #onetrust-button-group-parent{padding-left:4%;margin-left:0}#onetrust-banner-sdk.ot-buttons-fw:not(.ot-iab-2) #onetrust-button-group{margin-right:0;margin-top:1.25em;width:100%}#onetrust-banner-sdk.ot-buttons-fw:not(.ot-iab-2) #onetrust-button-g…
#onetrust-consent-sdk #onetrust-banner-sdk {background-color: #FFFFFF;}
#onetrust-consent-sdk #onetrust-policy-title
#onetrust-consent-sdk #onetrust-policy-text
#onetrust-consent-sdk .ot-b-addl-desc
#onetrust-consent-sdk .ot-dpd-desc
#onetrust-consent-sdk .ot-dpd-title
#onetrust-consent-sdk #onetrust-policy-text *:not(.onetrust-vendors-list-handler)
#onetrust-consent-sdk .ot-dpd-desc *:not(.onetrust-vendors-list-handler)
#onetrust-consent-sdk #onetrust-banner-sdk #banner-options * {
color: #696969;
}
#onetrust-consent-sdk #onetrust-banner-sdk .banner-option-details {
background-color: #E9E9E9;}
#onetrust-consent-sdk #onetrust-accept-btn-handler
#onetrust-banner-sdk #onetrust-reject-all-handler {
background-color: #00a0d2;border-color: #00a0d2;
color: #ffffff;
}
#onetrust-consent-sdk #onetrust-pc-btn-handler
#onetrust-consent-sdk #onetrust-pc-btn-handler.cookie-setting-link {
color: #00a0d2; border-color: #00a0d2;
background-color:
#FFFFFF;
}#onetrust-pc-sdk[_ngcontent-nof-c46] ul[_ngcontent-nof-c46] {
list-style: none;
padding: 0;
border-bottom: 1px solid #dadada;
margin-bottom: 1rem;
}
#onetrust-pc-sdk[_ngcontent-nof-c46] ul[_ngcontent-nof-c46] li[_ngcontent-nof-c46] {
margin: 0;
border: 1px solid #dadada;
border-bottom: none;
border-radius: 0;
}
#onetrust-pc-sdk[_ngcontent-nof-c46] .toggle[_ngcontent-nof-c46] .checkbox[_ngcontent-nof-c46] input[_ngcontent-nof-c46]:checked + label[_ngcontent-nof-c46]:after {
background: #00a0d2;
-webkit-box-shadow: 0px 1px 3px 0px rgba(0	0	0	0.35)	inset 0px -1px 0px 0px rgba(0	0	0	0.08);
box-shadow: 0px 1px 3px 0px rgba(0	0	0	0.35)	inset 0px -1px 0px 0px rgba(0	0	0	0.08);
}
#onetrust-pc-sdk[_ngcontent-nof-c46] .toggle[_ngcontent-nof-c46] .checkbox[_ngcontent-nof-c46] input[_ngcontent-nof-c46]:checked + label[_ngcontent-nof-c46] {
background: #99d9ed;
}
#onetrust-pc-sdk[_ngcontent-nof-c46] .toggle[_ngcontent-nof-c46] .checkbox[_ngcontent-nof-c46] label[_ngcontent-nof-c46]:after {
background: white;
-webkit-box-shadow: 0px 1px 3px 0px rgba(0	0	0	0.35)	inset 0px -1px 0px 0px rgba(0	0	0	0.08);
box-shadow: 0px 1px 3px 0px rgba(0	0	0	0.35)	inset 0px -1px 0px 0px rgba(0	0	0	0.08);
background: #ffffff;
}
#onetrust-pc-sdk[_ngcontent-nof-c46] .toggle[_ngcontent-nof-c46] .checkbox[_ngcontent-nof-c46] label[_ngcontent-nof-c46] {
background: #bababa;
}
#onetrust-pc-sdk[_ngcontent-nof-c46] button.pill[_ngcontent-nof-c46] {
box-shadow: none;
border-color: transparent;
}
#onetrust-pc-sdk[_ngcontent-nof-c46] .btn-group[_ngcontent-nof-c46] button[_ngcontent-nof-c46] {
border-radius: 0px;
}
.footer-logo[_ngcontent-nof-c46] {
margin: 2rem 0 0;
}
#onetrust-pc-sdk.otPcPopup[_ngcontent-nof-c46] {
border-radius: 0px;
min-width: 445px;
box-shadow: 0px 9px 46px rgba(0	0	0	0.12)	0px 24px 38px rgba(0	0	0	0.14);
}
#onetrust-pc-sdk[_ngcontent-nof-c46] #close-pc-btn-handler[_ngcontent-nof-c46] {
background-color: #555555;
}#onetrust-pc-sdk.otPcCenter{overflow:hidden;position:fixed;margin:0 auto;top:5%;bottom:10%;right:0;left:0;width:40%;max-width:575px;min-width:575px;border-radius:2.5px;z-index:2147483647;background-color:#fff;-webkit-box-shadow:0px 2px 10px -3px #999;-moz-box-shadow:0px 2px 10px -3px #999;box-shadow:0px 2px 10px -3px #999}#onetrust-pc-sdk.otPcCenter[dir=rtl]{right:0;left:0}#onetrust-pc-sdk #ot-a…	#onetrust-pc-sdk #ot-addtl-venlst .ot-plus-minus	#onetrust-pc-sdk .ot-hide-tgl{visibility:hidden}#onetrust-pc-sdk #ot-addtl-venlst .ot-arw-cntr *	#onetrust-pc-sdk #ot-addtl-venlst .ot-plus-minus *	#onetrust-pc-sdk .ot-hide-tgl *{visibility:hidden}#onetrust-pc-sdk #ot-gn-venlst .ot-ven-item .ot-acc-hdr{min-height:40px}#onetrust-pc-sdk .ot-pc-header{height:39px;padding:10px 0 10px 30px;border-bottom:1px solid #e9e9e9}#onetrust-pc-sdk #ot-pc-title	#onetrust-pc-sdk #ot-category-title	#onetrust-pc-sdk .ot-cat-header	#onetrust-pc-sdk #ot-lst-title	#onetrust-pc-sdk .ot-ven-hdr .ot-ven-name	#onetrust-pc-sdk .ot-always-active{font-weight:bold;color:dimgray}#onetrust-pc-sdk .ot-cat-header{float:left;font-weight:600;font-size:.875em;line-height:1.5;max-width:90%;vertical-align:middle}#onetrust-pc-sdk .ot-always-active-group .ot-cat-header{width:55%;font-weight:700}#onetrust-pc-sdk .ot-cat-item p{clear:both;float:left;margin-top:10px;margin-bottom:5px;line-height:1.5;font-size:.812em;co…	#onetrust-pc-sdk ul.ot-subgrps li h5{font-size:.813em;line-height:1.4;color:dimgray}#onetrust-pc-sdk ul.ot-subgrps .ot-switch{min-height:auto}#onetrust-pc-sdk ul.ot-subgrps .ot-switch-nob{top:0}#onetrust-pc-sdk ul.ot-subgrps .ot-acc-hdr{display:inline-block;width:100%}#onetrust-pc-sdk ul.ot-subgrps .ot-acc-txt{margin:0}#onetrust-pc-sdk ul.ot-subgrps li{padding:0;border:none}#onetrust-pc-sdk ul.ot…	#onetrust-pc-sdk li.ot-subgrp p>ul{margin:0px;list-style:disc;margin-left:15px;font-size:inherit}#onetrust-pc-sdk .ot-cat-item p>ul li	#onetrust-pc-sdk li.ot-subgrp p>ul li{font-size:inherit;padding-top:10px;padding-left:0px;padding-right:0px;border:none}#onetrust-pc-sdk .ot-cat-item p>ul li:last-child	#onetrust-pc-sdk li.ot-subgrp p>ul li:last-child{padding-bottom:10px}#onetrust-pc-sdk .ot-pc-logo{height:40px;width:120px;display:inline-block}#onetrust-pc-sdk .ot-pc-footer{position:absolute;bottom:0px;width:100%;max-height:160px;border-top:1px solid #d8d8d8}#onetrust-pc-sdk.ot-ftr-stacked .ot-pc-refuse-all-handler{margin-bottom:0px}#onetrust-pc-sdk.ot-ftr-stacked #ot-pc-content{bottom:160px}#on…	#onetrust-pc-sdk .ot-chkbox label::after{position:absolute;content:"";display:inline-block;border-radius:3px}#onetrust-pc-sdk .ot-chkbox label::before{height:18px;width:18px;border:1px solid #3860be;left:0px;top:auto}#onetrust-pc-sdk .ot-chkbox label::after{height:5px;width:9px;border-left:3px solid;border-bottom:3px solid;transform:rotate(-45deg);-o-transform:rotate(-45deg);-ms-transform:rotate(…	#onetrust-pc-sdk .ot-tgl input{position:absolute;opacity:0;width:0;height:0}#onetrust-pc-sdk .ot-arw-cntr{float:right;position:relative}#onetrust-pc-sdk .ot-arw-cntr .ot-arw{width:16px;height:16px;margin-left:5px;color:dimgray;display:inline-block;vertical-align:middle;-webkit-transition:all 300ms ease-in 0s;-moz-transition:all 300ms ease-in 0s;-o-transition:all 300ms ease-in 0s;transition:all 30…	#onetrust-pc-sdk .ot-arw-cntr{display:inline-block}#onetrust-pc-sdk .ot-tgl-cntr{width:45px;float:right;margin-top:2px}#onetrust-pc-sdk #ot-lst-cnt .ot-tgl-cntr{margin-top:10px}#onetrust-pc-sdk .ot-always-active-subgroup{width:auto;padding-left:0px !important;top:3px;position:relative}#onetrust-pc-sdk .ot-label-status{padding-left:5px;font-size:.75em;display:none}#onetrust-pc-sdk .ot-arw-cntr{mar…	#onetrust-pc-sdk .category-vendors-list-handler+a	#onetrust-pc-sdk .category-host-list-handler{clear:both;color:#3860be;margin-left:0;font-size:.813em;text-decoration:none;float:left;overflow:hidden}#onetrust-pc-sdk .category-vendors-list-handler:hover	#onetrust-pc-sdk .category-vendors-list-handler+a:hover	#onetrust-pc-sdk .category-host-list-handler:hover{color:#1883fd}#onetrust-pc-sdk .category-vendors-list-handler+a{clear:none}#onetrust-pc-sdk .category-vendors-list-handler+a::after{content:"";height:15px;width:15px;background-repeat:no-repeat;margin-left:5px;float:right;background-image:url("data:image/svg+xml	%3Csvg xmlns='http://www.w3.org/2000/svg' viewBox='0 0 511.626 511.627'%3E%3Cg fill='%231276CE'%3E%3Cpath d='M392.857 292.354h-18.274c-2.669 0-4.859.855-6.563 2.573-1.718 1.708-2.573 3.897-2.573 6.563v91.361c0 12.563-4.47 23.315-13.415 32.262-8.945 8.945-19.701 13.414-32.264 13.414H82.224c-12.562 0-23.317-4.469-32.264-13.414-8.945-8.946-13.417-19.698-13.417-32.262V155.31c0-12.562 4.471-23.313 13.…	0	0)}#onetrust-pc-sdk #ot-pc-lst{width:100%;bottom:160px;position:absolute;top:60px}#onetrust-pc-sdk #ot-pc-lst:not(.ot-enbl-chr) .ot-tgl-cntr .ot-arw-cntr	#onetrust-pc-sdk #ot-pc-lst:not(.ot-enbl-chr) .ot-tgl-cntr .ot-arw-cntr *{visibility:hidden}#onetrust-pc-sdk #ot-pc-lst .ot-tgl-cntr{right:12px;position:absolute}#onetrust-pc-sdk #ot-pc-lst .ot-arw-cntr{float:right;position:relative}#onetrust-pc-sdk #ot-pc-lst .ot-arw{margin-left:10px}#onetrust-pc-sdk #ot-pc-lst .ot-acc-hdr{overflow:hidden;cursor:pointer}#onetrust-pc-sdk .ot-vlst-cntr{overflow:hi…	1%);-o-transform:translate(0	1%);-ms-transform:translate(0	1%);-webkit-transform:translate(0	1%);position:relative;z-index:2}#onetrust-pc-sdk .ot-ven-link *{font-size:inherit}#onetrust-pc-sdk .ot-ven-link:hover{text-decoration:underline}#onetrust-pc-sdk .ot-ven-hdr{width:calc(100% - 160px);height:auto;float:left;word-break:break-word;word-wrap:break-word;vertical-align:middle;padding-bottom:3px}#onetrust-pc-sdk .ot-ven-link{letter-spacing:.03em;font-size:.75em;font-weight:400}#onetrust-p…	#onetrust-pc-sdk .ot-host-desc{display:inline-block;width:90%}#onetrust-pc-sdk .ot-host-hdr>a{text-decoration:underline;font-size:.82em;position:relative;z-index:2;float:left;margin-bottom:5px}#onetrust-pc-sdk .ot-host-name+a{margin-top:5px}#onetrust-pc-sdk .ot-host-name	#onetrust-pc-sdk .ot-host-name a	#onetrust-pc-sdk .ot-host-desc	#onetrust-pc-sdk .ot-host-info{color:dimgray;word-break:break-word;word-wrap:break-word}#onetrust-pc-sdk .ot-host-name	#onetrust-pc-sdk .ot-host-name a{font-weight:bold;font-size:.82em;line-height:1.3}#onetrust-pc-sdk .ot-host-name a{font-size:1em}#onetrust-pc-sdk .ot-host-expand{margin-top:3px;margin-bottom:3px;clear:both;display:block;color:#3860be;font-size:.72em;font-weight:normal}#onetrust-pc-sdk .ot-host-expand *{font-size:inherit}#onetrust-pc-sdk .ot-host-desc	#onetrust-pc-sdk .ot-host-info{font-size:.688em;line-height:1.4;font-weight:normal}#onetrust-pc-sdk .ot-host-desc{margin-top:10px}#onetrust-pc-sdk .ot-host-opt{margin:0;font-size:inherit;display:inline-block;width:100%}#onetrust-pc-sdk .ot-host-opt li>div div{font-size:.8em;padding:5px 0}#onetrust-pc-sdk .ot-host-opt li>div div:nth-child(1){width:30%;float:left}#onetrust-pc-sdk .ot-host-opt li>di…	#onetrust-pc-sdk #ot-selall-adtlvencntr	#onetrust-pc-sdk #ot-selall-hostcntr	#onetrust-pc-sdk #ot-selall-licntr	#onetrust-pc-sdk #ot-selall-gnvencntr{right:15px;position:relative;width:20px;height:20px;float:right}#onetrust-pc-sdk #ot-selall-vencntr label	#onetrust-pc-sdk #ot-selall-adtlvencntr label	#onetrust-pc-sdk #ot-selall-hostcntr label	#onetrust-pc-sdk #ot-selall-licntr label	#onetrust-pc-sdk #ot-selall-gnvencntr label{float:left;padding-left:0}#onetrust-pc-sdk #ot-ven-lst:first-child{border-top:1px solid #e2e2e2}#onetrust-pc-sdk ul{list-style:none;padding:0}#onetrust-pc-sdk ul li{position:relative;margin:0;padding:15px 15px 15px 10px;border-bottom:1px solid #e2e2e2}#onetrust-pc-sdk ul li h3{font-size:.75em;color:#656565;margin:0;display:inline-block;width:70%;height:…	#onetrust-pc-sdk .ot-acc-cntr>button:focus	#onetrust-pc-sdk li>button:focus{outline:#000 solid 2px}#onetrust-pc-sdk .ot-cat-item>button	#onetrust-pc-sdk .ot-acc-cntr>button	#onetrust-pc-sdk li>button{position:absolute;cursor:pointer;width:100%;height:100%;margin:0;top:0;left:0;z-index:1;max-width:none;border:none}#onetrust-pc-sdk .ot-cat-item>button[aria-expanded=false]~.ot-acc-txt	#onetrust-pc-sdk .ot-acc-cntr>button[aria-expanded=false]~.ot-acc-txt	#onetrust-pc-sdk li>button[aria-expanded=false]~.ot-acc-txt{margin-top:0;max-height:0;opacity:0;overflow:hidden;width:100%;transition:.25s ease-out;display:none}#onetrust-pc-sdk .ot-cat-item>button[aria-expanded=true]~.ot-acc-txt	#onetrust-pc-sdk .ot-acc-cntr>button[aria-expanded=true]~.ot-acc-txt
#onetrust-consent-sdk #onetrust-pc-sdk
#onetrust-consent-sdk #ot-search-cntr
#onetrust-consent-sdk #onetrust-pc-sdk .ot-switch.ot-toggle
#onetrust-consent-sdk #onetrust-pc-sdk ot-grp-hdr1 .checkbox
#onetrust-consent-sdk #onetrust-pc-sdk #ot-pc-title:after
	#onetrust-consent-sdk #onetrust-pc-sdk #ot-sel-blk
#onetrust-consent-sdk #onetrust-pc-sdk #ot-fltr-cnt
#onetrust-consent-sdk #onetrust-pc-sdk #ot-anchor {
background-color: #FFFFFF;
}
#onetrust-consent-sdk #onetrust-pc-sdk h3
#onetrust-consent-sdk #onetrust-pc-sdk h4
#onetrust-consent-sdk #onetrust-pc-sdk h5
#onetrust-consent-sdk #onetrust-pc-sdk h6
#onetrust-consent-sdk #onetrust-pc-sdk p
#onetrust-consent-sdk #onetrust-pc-sdk #ot-ven-lst .ot-ven-opts p
#onetrust-consent-sdk #onetrust-pc-sdk #ot-pc-desc
#onetrust-consent-sdk #onetrust-pc-sdk #ot-pc-title
#onetrust-consent-sdk #onetrust-pc-sdk .ot-li-title
#onetrust-consent-sdk #onetrust-pc-sdk .ot-sel-all-hdr span
#onetrust-consent-sdk #onetrust-pc-sdk #ot-host-lst .ot-host-info
#onetrust-consent-sdk #onetrust-pc-sdk #ot-fltr-modal #modal-header
#onetrust-consent-sdk #onetrust-pc-sdk .ot-checkbox label span
#onetrust-consent-sdk #onetrust-pc-sdk #ot-pc-lst #ot-sel-blk p
#onetrust-consent-sdk #onetrust-pc-sdk #ot-pc-lst #ot-lst-title span
#onetrust-consent-sdk #onetrust-pc-sdk #ot-pc-lst .back-btn-handler p
#onetrust-consent-sdk #onetrust-pc-sdk #ot-pc-lst .ot-ven-name
#onetrust-consent-sdk #onetrust-pc-sdk #ot-pc-lst #ot-ven-lst .consent-category
#onetrust-consent-sdk #onetrust-pc-sdk .ot-leg-btn-container .ot-inactive-leg-btn
#onetrust-consent-sdk #onetrust-pc-sdk .ot-label-status
#onetrust-consent-sdk #onetrust-pc-sdk .ot-chkbox label span
#onetrust-consent-sdk #onetrust-pc-sdk #clear-filters-handler
{
color: #696969;
}
#onetrust-consent-sdk #onetrust-pc-sdk .privacy-notice-link
#onetrust-consent-sdk #onetrust-pc-sdk .category-vendors-list-handler
#onetrust-consent-sdk #onetrust-pc-sdk .category-vendors-list-handler + a
#onetrust-consent-sdk #onetrust-pc-sdk .category-host-list-handler
#onetrust-consent-sdk #onetrust-pc-sdk .ot-ven-link
#onetrust-consent-sdk #onetrust-pc-sdk #ot-host-lst .ot-host-name a
#onetrust-consent-sdk #onetrust-pc-sdk #ot-host-lst .ot-acc-hdr .ot-host-expand
#onetrust-consent-sdk #onetrust-pc-sdk #ot-host-lst .ot-host-info a
{
color: #00a0d2;
}
#onetrust-consent-sdk #onetrust-banner-sdk a[href]
#onetrust-consent-sdk #onetrust-banner-sdk .ot-link-btn
{
color: #00a0d2;
}
#onetrust-consent-sdk #onetrust-pc-sdk .category-vendors-list-handler:hover { opacity: .7;}
#onetrust-consent-sdk #onetrust-pc-sdk .ot-acc-grpcntr.ot-acc-txt
#onetrust-consent-sdk #onetrust-pc-sdk .ot-acc-txt .ot-subgrp-tgl .ot-switch.ot-toggle
{
background-color: #F8F8F8;
}
#onetrust-consent-sdk #onetrust-pc-sdk #ot-host-lst .ot-host-info
#onetrust-consent-sdk #onetrust-pc-sdk .ot-acc-txt .ot-ven-dets
{
background-color: #F8F8F8;
}
#onetrust-consent-sdk #onetrust-pc-sdk
button:not(#clear-filters-handler):not(.ot-close-icon):not(#filter-btn-handler):not(.ot-remove-objection-handler):not(.ot-obj-leg-btn-handler):not([aria-expanded]):not(.ot-link-btn)
#onetrust-consent-sdk #onetrust-pc-sdk .ot-leg-btn-container .ot-active-leg-btn {
background-color: #00a0d2;border-color: #00a0d2;
color: #FFFFFF;
}
#onetrust-consent-sdk #onetrust-pc-sdk .ot-active-menu {
border-color: #00a0d2;
}
#onetrust-consent-sdk #onetrust-pc-sdk .ot-leg-btn-container .ot-remove-objection-handler{
background-color: transparent;
border:1px solid transparent;
}
#onetrust-consent-sdk #onetrust-pc-sdk .ot-leg-btn-container .ot-inactive-leg-btn {
background-color: #FFFFFF;
color: #78808E; border-color: #78808E;
}
.ot-sdk-cookie-policy{font-family:inherit;font-size:16px}.ot-sdk-cookie-policy h3	.ot-sdk-cookie-policy h4	.ot-sdk-cookie-policy h6	.ot-sdk-cookie-policy p	.ot-sdk-cookie-policy li	.ot-sdk-cookie-policy a	.ot-sdk-cookie-policy th	.ot-sdk-cookie-policy #cookie-policy-description	.ot-sdk-cookie-policy .ot-sdk-cookie-policy-group	.ot-sdk-cookie-policy #cookie-policy-title{color:dimgray}.ot-sdk-cookie-policy #cookie-policy-description{margin-bottom:1em}.ot-sdk-cookie-policy h4{font-size:1.2em}.ot-sdk-cookie-policy h6{font-size:1em;margin-top:2em}.ot-sdk-cookie-policy th{min-width:75px}.ot-sdk-cookie-policy a	.ot-sdk-cookie-policy a:hover{background:#fff}.ot-sdk-cookie-policy thead{background-color:#f6f6f4;font-weight:bold}.ot-sdk-cookie-policy .ot-mobile-border{display:none}.ot-sdk-cookie-policy section{margin-bottom:2em}.ot-sdk-cookie-policy table{border-collapse:inherit}#ot-sdk-cookie-policy-v2.ot-sdk-cookie-policy{font-family:inherit;font-size:16px}#ot-sdk-cookie-policy-v2.ot-sdk-cookie-policy h3	#ot-sdk-cookie-policy-v2.ot-sdk-cookie-policy h4	#ot-sdk-cookie-policy-v2.ot-sdk-cookie-policy h6	#ot-sdk-cookie-policy-v2.ot-sdk-cookie-policy p	#ot-sdk-cookie-policy-v2.ot-sdk-cookie-policy li	#ot-sdk-cookie-policy-v2.ot-sdk-cookie-policy a	#ot-sdk-cookie-policy-v2.ot-sdk-cookie-policy th	#ot-sdk-cookie-policy-v2.ot-sdk-cookie-policy #cookie-policy-description	#ot-sdk-cookie-policy-v2.ot-sdk-cookie-policy .ot-sdk-cookie-policy-group	#ot-sdk-cookie-policy-v2.ot-sdk-cookie-policy #cookie-policy-title{color:dimgray}#ot-sdk-cookie-policy-v2.ot-sdk-cookie-policy #cookie-policy-description{margin-bottom:1em}#ot-sdk-cookie-policy-v2.ot-sdk-cookie-policy .ot-sdk-subgroup{margin-left:1.5em}#ot-sdk-cookie-policy-v2.ot-sdk-cookie-policy #cookie-policy-description	#ot-sdk-cookie-policy-v2.ot-sdk-cookie-policy .ot-sdk-cookie-policy-group-desc	#ot-sdk-cookie-policy-v2.ot-sdk-cookie-policy .ot-table-header	#ot-sdk-cookie-policy-v2.ot-sdk-cookie-policy a	#ot-sdk-cookie-policy-v2.ot-sdk-cookie-policy span	#ot-sdk-cookie-policy-v2.ot-sdk-cookie-policy td{font-size:.9em}#ot-sdk-cookie-policy-v2.ot-sdk-cookie-policy td span	#ot-sdk-cookie-policy-v2.ot-sdk-cookie-policy td a{font-size:inherit}#ot-sdk-cookie-policy-v2.ot-sdk-cookie-policy .ot-sdk-cookie-policy-group{font-size:1em;margin-bottom:.6em}#ot-sdk-cookie-policy-v2.ot-sdk-cookie-policy .ot-sdk-cookie-policy-title{margin-bottom:1.2em}#ot-sdk-cookie-policy-v2.ot-sdk-cookie-policy>section{margin-bottom:1em}#ot-sdk-cookie-policy-v2.ot-sdk-cookie-policy th{min-widt…	#ot-sdk-cookie-policy-v2.ot-sdk-cookie-policy a:hover{background:#fff}#ot-sdk-cookie-policy-v2.ot-sdk-cookie-policy thead{background-color:#f6f6f4;font-weight:bold}#ot-sdk-cookie-policy-v2.ot-sdk-cookie-policy .ot-mobile-border{display:none}#ot-sdk-cookie-policy-v2.ot-sdk-cookie-policy section{margin-bottom:2em}#ot-sdk-cookie-policy-v2.ot-sdk-cookie-policy .ot-sdk-subgroup ul li{list-style:disc;m…	#ot-sdk-cookie-policy-v2.ot-sdk-cookie-policy table td{border-bottom:1px solid #d7d7d7;border-right:1px solid #d7d7d7}#ot-sdk-cookie-policy-v2.ot-sdk-cookie-policy table tr:last-child td{border-bottom:0px}#ot-sdk-cookie-policy-v2.ot-sdk-cookie-policy table tr th:last-child	#ot-sdk-cookie-policy-v2.ot-sdk-cookie-policy table tr td:last-child{border-right:0px}#ot-sdk-cookie-policy-v2.ot-sdk-cookie-policy table .ot-host	#ot-sdk-cookie-policy-v2.ot-sdk-cookie-policy table .ot-cookies-type{width:25%}.ot-sdk-cookie-policy[dir=rtl]{text-align:left}#ot-sdk-cookie-policy h3{font-size:1.5em}@media only screen and (max-width: 530px){.ot-sdk-cookie-policy:not(#ot-sdk-cookie-policy-v2) table	.ot-sdk-cookie-policy:not(#ot-sdk-cookie-policy-v2) thead	.ot-sdk-cookie-policy:not(#ot-sdk-cookie-policy-v2) tbody	.ot-sdk-cookie-policy:not(#ot-sdk-cookie-policy-v2) th	.ot-sdk-cookie-policy:not(#ot-sdk-cookie-policy-v2) td	.ot-sdk-cookie-policy:not(#ot-sdk-cookie-policy-v2) tr{display:block}.ot-sdk-cookie-policy:not(#ot-sdk-cookie-policy-v2) thead tr{position:absolute;top:-9999px;left:-9999px}.ot-sdk-cookie-policy:not(#ot-sdk-cookie-policy-v2) tr{margin:0 0 1em 0}.ot-sdk-cookie-policy:not(#ot-sdk-cookie-policy-v2) tr:nth-child(odd)	.ot-sdk-cookie-policy:not(#ot-sdk-cookie-policy-v2) tr:nth-child(odd) a{background:#f6f6f4}.ot-sdk-cookie-policy:not(#ot-sdk-cookie-policy-v2) td{border:none;border-bottom:1px solid #eee;position:relative;padding-left:50%}.ot-sdk-cookie-policy:not(#ot-sdk-cookie-policy-v2) td:before{position:absolute;height:100%;left:6px;width:40%;padding-right:10px}.ot-sdk-cookie-policy:not(#ot-sdk-cookie-policy…	#ot-sdk-cookie-policy-v2.ot-sdk-cookie-policy thead	#ot-sdk-cookie-policy-v2.ot-sdk-cookie-policy tbody	#ot-sdk-cookie-policy-v2.ot-sdk-cookie-policy th	#ot-sdk-cookie-policy-v2.ot-sdk-cookie-policy td	#ot-sdk-cookie-policy-v2.ot-sdk-cookie-policy tr{display:block}#ot-sdk-cookie-policy-v2.ot-sdk-cookie-policy table .ot-host	#ot-sdk-cookie-policy-v2.ot-sdk-cookie-policy table .ot-cookies-type{width:auto}#ot-sdk-cookie-policy-v2.ot-sdk-cookie-policy tr{margin:0 0 1em 0}#ot-sdk-cookie-policy-v2.ot-sdk-cookie-policy td:before{height:100%;width:40%;padding-right:10px}#ot-sdk-cookie-policy-v2.ot-sdk-cookie-policy td:before{content:attr(data-label);font-weight:bold}#ot-sdk-cookie-policy-v2.ot-sdk-cookie-policy li{word-brea…
#ot-sdk-cookie-policy-v2.ot-sdk-cookie-policy h5
#ot-sdk-cookie-policy-v2.ot-sdk-cookie-policy h6
#ot-sdk-cookie-policy-v2.ot-sdk-cookie-policy li
#ot-sdk-cookie-policy-v2.ot-sdk-cookie-policy p
#ot-sdk-cookie-policy-v2.ot-sdk-cookie-policy a
#ot-sdk-cookie-policy-v2.ot-sdk-cookie-policy span
#ot-sdk-cookie-policy-v2.ot-sdk-cookie-policy td
#ot-sdk-cookie-policy-v2.ot-sdk-cookie-policy #cookie-policy-description {
color: #696969;
}
#ot-sdk-cookie-policy-v2.ot-sdk-cookie-policy th {
color: #696969;
}
#ot-sdk-cookie-policy-v2.ot-sdk-cookie-policy .ot-sdk-cookie-policy-group {
color: #696969;
}
#ot-sdk-cookie-policy-v2.ot-sdk-cookie-policy #cookie-policy-title {
color: #696969;
}
#ot-sdk-cookie-policy-v2.ot-sdk-cookie-policy table th {
background-color: #F8F8F8;
}
</style><script type="text/javascript" charset="UTF-8" src="./Datasheet1_files/common.js.download"></script><script type="text/javascript" charset="UTF-8" src="./Datasheet1_files/util.js.download"></script></head>
<body class="journal-molecular-biosciences section-molecular-diagnostics-and-therapeutics modal-open" style="padding-right: 17px;"><div id="MathJax_Message" style="display: none;"></div>
<!-- Google Tag Manager (noscript) -->
<noscript>
<iframe src="https://www.googletagmanager.com/ns.html?id=GTM-TZGWTGG&gtm_auth=fCzlsmYQFAUQ_UXneGJNag&gtm_preview=env-2&gtm_cookies_win=x"
height="0" width="0" style="display:none;visibility:hidden"></iframe>
</noscript>
<!-- End Google Tag Manager (noscript) -->
<div data-navigation-plugin="header">
<nav class="ibar__wrapper" id="main_ibar">
<div class="ibar__touch-wrapper">
<a data-event="ibar-logo-link" data-event-param="click_header_home" href="https://www.frontiersin.org/" class="ibar__logo" data-test-id="header_logo_link">
<img src="./Datasheet1_files/admin-header-logo.png" alt="Frontiers Logo" class="ibar__logo__img">
</a>
<div class="ibar__spacer-md"></div>
<a href="https://www.frontiersin.org/search?origin=https://www.frontiersin.org/articles/10.3389/fmolb.2021.645388/full#supplementary-material" class="ibar__search-icon ibar__search-icon--touch"></a>
<div class="ibar__burger">
<ul>
<li></li>
<li></li>
<li></li>
</ul>
</div></div>
<div class="ibar__nav-wrapper">
<div class="ibar__inner">
<div class="ibar__limitWrapper">
<div class="ibar__limitInner">
<ul id="leftNavigationMenu" class="ibar__nav-list">
<li class="ibar__nav-list__item">
<a data-event="ibar-navigation" data-event-param="about" class="ibar__nav-list__link" data-test-id="nav_menu_about_link" href="https://www.frontiersin.org/about/about-frontiers">About</a>
</li>
<li class="ibar__nav-list__item">
<a data-event="ibar-navigation" data-event-param="journals" class="ibar__nav-list__link" data-test-id="nav_menu_journals_link" href="https://www.frontiersin.org/journals">Journals</a>
</li>
<li class="ibar__nav-list__item">
<a data-event="ibar-navigation" data-event-param="research_topics" class="ibar__nav-list__link" data-test-id="nav_menu_research_topics_link" href="https://www.frontiersin.org/research-topics">Research Topics</a>
</li>
<li class="ibar__nav-list__item">
<a data-event="ibar-navigation" data-event-param="articles" class="ibar__nav-list__link" data-test-id="nav_menu_articles_link" href="https://www.frontiersin.org/articles">Articles</a>
</li>
<li class="ibar__nav-list__item ibar__user__nav-dropdown is-hidden" id="see-more">
<div class="ibar__nav-list__link ibar__user__dropdown-trigger">More</div>
<div class="ibar__user__dropdown-list ibar__user__dropdown-list--more is-hidden">
<ul class="ibar__user__level ibar__more-dropdown ibar__user__level--product" id="see-more-dropdown"></ul>
</div>
</li></ul>
<a data-event="ibar-submit-button" data-event-param="click_header_submit" class="ibar__submit ibar__submit--margin-right-only show-only-desktop" data-test-id="submit_link" href="https://www.frontiersin.org/submission/submit">Submit</a><a data-event="ibar-search-icon" data-event-param="click_search" href="https://www.frontiersin.org/search?tab=top-results&amp;origin=https://www.frontiersin.org/art…
</div>
</div>
<div class="ibar__user">
<a data-event="ibar-myfrontiers" data-event-param="click_my_frontiers" href="https://www.frontiersin.org/my-frontiers/overview" data-test-id="user_navigation_my_frontiers_link" class="ibar__user__link">My Frontiers</a>
<div class="ibar__user__nav-dropdown ibar__user__nav-dropdown--office">
<div class="ibar__user__dropdown-trigger ibar__user__dropdown-trigger--office ibar__user__link js-multilevel" id="office" data-test-id="office_dropdown_link">Office</div>
<div class="ibar__user__dropdown-list ibar__user__dropdown-list--align-right ibar__user__dropdown-list--multilevel">
<ul class="ibar__user__level ibar__user__level--multilevel ibar__user__level--current" style="left: 0px;" data-level="1"><li><a class="ibar__user__dropdown-link ibar__user__dropdown-link--multilevel ibar__user__dropdown-link--trigger-next-level-dd" data-test-id="office_dropdown_tsof_link" data-id="TSOF">TSOF</a>
<ul data-id="TSOF" class="ibar__user__level__sublevel ibar__user__level__sublevel--hidden">
<li><a class="ibar__user__dropdown-link ibar__user__dropdown-link--trigger-prev-level-dd" data-test-id="office_dropdown_tsof_back_link">TSOF</a>
</li><li><a class="ibar__user__dropdown-link" href="https://www.frontiersin.org/Admin/TSOF/ManageArticles.aspx?stage=100" data-test-id="office_dropdown_menu_item_article_production_link">Article Production</a></li></ul></li></ul>
</div>
</div>
<div class="ibar__user__nav-dropdown ibar__user__nav-dropdown--office">
<a data-event="ibar-user" data-event-param="click_header_user" class="ibar__user__dropdown-trigger ibar__user__dropdown-trigger--office ibar__user__dropdown-trigger--not-arrow ibar__user__link ibar__user__link--user-name show-only-desktop">
<img class="ibar__user__profile-pic" src="./Datasheet1_files/203" alt="Typesetter 3">
</a>
<div class="ibar__user__dropdown-list ibar__user__dropdown-list--user ibar__user__dropdown-list--align-right ibar__user__dropdown-list--user-links">
<div class="ibar__info">
<img class="ibar__user__profile-pic ibar__user__profile-pic--info" src="./Datasheet1_files/203" alt="Typesetter 3">
<div class="ibar__info__wrapper">
<div class="ibar__info__name">Typesetter 3</div>
<div class="ibar__info__email">frontiersproduction@tnq.co.in</div>
</div>
</div>
<ul class="ibar__user__level ibar__user__level--profile" style="left: 0px;">
<li><a data-event="ibar-profile" data-event-param="profile" href="https://loop.frontiersin.org/people/me" class="ibar__user__dropdown-link" data-test-id="user_profile_profile_link">Profile</a></li><li><a data-event="ibar-profile" data-event-param="settings_privacy" href="https://loop.frontiersin.org/settings" class="ibar__user__dropdown-link" data-test-id="user_profile_settings_&amp;_privacy_link…
</ul>
</div>
</div>
</div>
</div>
<a href="https://www.frontiersin.org/submission/submit" class="ibar__submit show-only-mobile" data-test-id="submit_link_mobile">Submit</a>
</div>
</nav></div>
<script src="./Datasheet1_files/js(1)"></script>
<script src="./Datasheet1_files/vendors"></script>
<!--[if lte IE 8]>
<div class="row">
<div class="col-md-16">
<div style="margin-bottom: 15px;"><h2>Warning!</h2><p>You are using an <strong>outdated</strong> browser. This page doesn't support Internet Explorer 6	7 and 8.<br />Please <a class="blue" href="http://browsehappy.com/">upgrade your browser</a> or <a class="blue" href="http://www.google.com/chromeframe/?redirect=true">activate Google Chrome Frame</a> to improve your experience.</p></div>
</div>
</div>
<![endif]-->
<div class="page-container">
<header>
<a href="https://www.frontiersin.org/about/impact?utm_source=fweb&amp;utm_medium=fjour&amp;utm_campaign=impact-2020-jour-hp-top" target="_blank">
<div class="marketing journal-marketing-message no-impact">
<span class="message">
<p><strong>Impact Factor 4.188</strong> |<strong> CiteScore 5.1<br></strong>More on impact ›</p>
</span>
</div>
</a>
<div id="journal-header" class="journal-home" style="position: relative;">
<div class="container-fluid main-container-xxl">
<table id="logo-table" style="width:100%">
<tbody><tr>
<td width="50%" valign="bottom" align="right" class="left-cell">
<h1>
<a href="https://www.frontiersin.org/journals/698" data-test-id="journal-link">
<span>Frontiers </span>in Molecular Biosciences
</a>
</h1>
</td>
<td class="right-cell" width="50%" style="vertical-align: bottom">
<h2>
<a href="https://www.frontiersin.org/journals/698/sections/701" data-test-id="section-link" class="btn btn-link">
Molecular Diagnostics and Therapeutics
</a>
</h2>
</td>
</tr>
</tbody></table>
</div>
</div>
<div id="journal-nav">
<div class="container-fluid main-container-xxl">
<div class="row">
<div class="col-md-12">
<div class="nav-wrapper">
<nav class="navbar navbar-default">
<!-- Brand and toggle get grouped for better mobile display -->
<button type="button" class="navbar-toggle collapsed" data-toggle="collapse" data-target="#journal-navbar-collapse">
<span class="sr-only">Toggle navigation</span>
<span class="pull-left">
<span class="icon-bar"></span>
<span class="icon-bar"></span>
<span class="icon-bar"></span>
</span>
<span class="pull-right hidden-xs">Section</span>
</button>
<!-- Collect the nav links	forms	and other content for toggling -->
<div class="collapse navbar-collapse no-transition journal-nav-bar" id="journal-navbar-collapse">
<ul class="nav navbar-nav">
<li class="tab-overview icon icon-left">
<a id="journal_nav_home" href="https://www.frontiersin.org/journals/molecular-biosciences/sections/molecular-diagnostics-and-therapeutics#"><span class="sr-only">(current)</span><i class="fa fa-home"></i>Section</a>
</li>
<li class="tab-about">
<a id="journal_nav_about" href="https://www.frontiersin.org/journals/molecular-biosciences/sections/molecular-diagnostics-and-therapeutics#about">About</a>
</li>
<li class="tab-archive active">
<a id="journal_nav_articles" href="https://www.frontiersin.org/journals/molecular-biosciences/sections/molecular-diagnostics-and-therapeutics#articles">Articles</a>
</li>
<li class="tab-research-topics">
<a id="journal_nav_research_topics" href="https://www.frontiersin.org/journals/molecular-biosciences/sections/molecular-diagnostics-and-therapeutics#research-topics">Research topics</a>
</li>
<li class="dropdown">
<a id="journal_nav_for_authors" href="https://www.frontiersin.org/articles/10.3389/fmolb.2021.645388/full#" class="dropdown-toggle" data-toggle="dropdown" role="button" aria-expanded="false">For authors <span class="caret"></span></a>
<ul class="dropdown-menu" role="menu">
<li><a id="for_authors_why_submit" href="https://www.frontiersin.org/journals/molecular-biosciences/sections/molecular-diagnostics-and-therapeutics#why-submit">Why submit?</a></li>
<li><a id="for_authors_fees" href="https://www.frontiersin.org/about/publishing-fees" target="_blank">Fees</a></li>
<li><a id="for_authors_article_types" href="https://www.frontiersin.org/journals/molecular-biosciences/sections/molecular-diagnostics-and-therapeutics#article-types">Article types</a></li>
<li><a id="for_authors_authors_guidelines" href="https://www.frontiersin.org/journals/molecular-biosciences/sections/molecular-diagnostics-and-therapeutics#author-guidelines">Author guidelines</a></li>
<li><a id="for_authors_review_guidelines" href="https://www.frontiersin.org/journals/molecular-biosciences/sections/molecular-diagnostics-and-therapeutics#review-guidelines">Review guidelines</a></li>
<li><a id="for_authors_submission_checklist" href="https://www.frontiersin.org/journals/molecular-biosciences/sections/molecular-diagnostics-and-therapeutics#submission-checklist">Submission checklist</a></li>
<li><a id="for_authors_contact_editorial_office" href="https://www.frontiersin.org/journals/molecular-biosciences/sections/molecular-diagnostics-and-therapeutics#contact-editorial-office">Contact editorial office</a></li>
<li><a id="for_authors_submit_manuscript" href="https://www.frontiersin.org/submission/submissioninfo.aspx" class="action-link">Submit your manuscript</a></li>
</ul>
</li>
<li class="tab-editorial-board">
<a id="journal_nav_Editorial_Board" href="https://www.frontiersin.org/journals/molecular-biosciences/sections/molecular-diagnostics-and-therapeutics#editorial-board">Editorial board</a>
</li>
</ul>
</div><!-- /.navbar-collapse -->
<ul class="list-inline follow-us nav navbar-nav">
<li class="twitter icon button">
<a data-test-id="twitter-link" href="https://twitter.com/@FrontMolBioSci">
<i class="fa fa-twitter"></i>
</a>
</li>
<li class="rss icon button">
<a data-test-id="rss-link" href="https://www.frontiersin.org/journals/molecular-biosciences/sections/molecular-diagnostics-and-therapeutics/rss">
<i class="fa fa-rss"></i>
</a>
</li>
<li class="alerts icon button">
<a data-test-id="alert-link" href="http://connect.frontiersin.org/subscriptions/subscribe?item=1&amp;field=102">
<i class="fa fa-bell" style="width: auto; padding-right: 7px; padding-left: 7px;"><span class="article-alert-text" style="font-family: MuseoSans	&#39;Helvetica Neue&#39;	Helvetica	Arial	sans-serif; margin-left: 6px; font-weight: 700; letter-spacing: 0px; font-size: 13px;">Article alerts</span></i>
</a>
</li>
</ul>
</nav>
</div><!-- / .nav-wrapper -->
</div>
</div>
</div>
</div>
</header>
<div class="journal-actions article-actions">
<div class="container-fluid main-container-xxl">
<div class="row">
<div class="col-lg-6 col-md-6 col-lg-push-6 col-md-push-6 col-research-topic">
</div>
<section class="col-lg-4 col-lg-offset-2 col-md-6 col-md-offset-0 col-lg-pull-6 col-md-pull-6">
<a href="https://www.frontiersin.org/journals/698/sections/701#articles" class="archive-link hidden-sm hidden-xs" data-test-id="archive-link">
<i class="fa fa-angle-left"></i> Articles
</a>
</section>
</div>
</div>
</div>
<aside id="anchors" class="pull-left table-of-contents side-article">
<div class="side-people hidden-sm hidden-xs">
</div>
<nav>
</nav>
</aside>
<div id="article" class="boxed white no-padding">
<div class="container-fluid main-container-xxl">
<div class="side-article-mrk hidden-md hidden-lg top clearfix">
<p style="text-align: center;"><a href="https://spotlight.frontiersin.org/submit?utm_source=fweb&amp;utm_medium=fjour&amp;utm_campaign=rtlg_2020_gen"><img src="./Datasheet1_files/article-marketing-message-79982763-254d-4bb6-96b8-126758de1166.png" alt=""><br></a></p>
<p style="text-align: center;"><a href="https://spotlight.frontiersin.org/submit?utm_source=fweb&amp;utm_medium=fjour&amp;utm_campaign=rtlg_2020_gen"><strong>Suggest a Research Topic &gt;</strong></a></p>
</div>
<div class="row">
<aside class="a col-xs-12 col-sm-12 col-lg-2 col-md-3 pull-right side-article right-container">
<button type="button" class="navbar-toggle navbar-share collapsed" data-toggle="collapse" data-target=".show" aria-expanded="false">
<span class="icon"><i class="fa fa-share-alt"></i></span>
</button>
<div class="side-article-impact">
<ul class="nav">
<li class="impact-data" title="" data-original-title="The total view count is updated once a day	so not to worry if you don&#39;t see immediate results.">
<span class="title-number">50</span>
<span class="title-text">total views</span>
</li>
<li class="hidden-sm hidden-xs">
<div class="altmetric-icon">
<div class="altmetric-embed" data-badge-type="1" data-doi="10.3389/fmolb.2021.645388" data-link-target="new" data-uuid="6ffcff86-2825-fbae-0fd5-1c871937006e"><a href="https://www.altmetric.com/details.php?domain=www.frontiersin.org&amp;doi=10.3389%2Ffmolb.2021.645388" target="new" style="cursor: pointer; display: inline-block; background-image: url(&quot;https://d1uo4w7k31k5mn.cloudfront.net/v1/0…
</div>
</li>
</ul>
<a type="button" class="btn btn-default hidden-sm hidden-xs btn-impact " data-test-id="view-article-impact" href="http://loop-impact.frontiersin.org/impact/article/645388#views" target="_blank">
<span class="icon-impact"><i class="fa fa-line-chart"></i></span> View Article Impact
</a>
</div>
<div class="side-article-mrk hidden-sm hidden-xs clearfix">
<p style="text-align: center;"><a href="https://spotlight.frontiersin.org/submit?utm_source=fweb&amp;utm_medium=fjour&amp;utm_campaign=rtlg_2020_gen"><img src="./Datasheet1_files/article-marketing-message-79982763-254d-4bb6-96b8-126758de1166.png" alt=""><br></a></p>
<p style="text-align: center;"><a href="https://spotlight.frontiersin.org/submit?utm_source=fweb&amp;utm_medium=fjour&amp;utm_campaign=rtlg_2020_gen"><strong>Suggest a Research Topic &gt;</strong></a></p>
</div>
<div class="side-article-share show collapse">
<h5 class="like-h4">SHARE ON</h5>
<ul class="share-media clearfix" style="padding: 0;">
<li class="social_block">
<div class="atButton">
<a class="addthis_button_facebook at300b" addthis:title="Mining TCGA data for key biomarkers related to immune microenvironment in endometrial carcinoma by immune score and weighted correlation network analysis" addthis:description="Background: Endometrial cancer (EC) is one of the most lethal gynecological cancers around the world. The aim of this study is to identify the potential immune microe…	CIBERSORT was applied to evaluate the relative abundances of 22 immune cell types in EC.Results: Immune scores were significantly associated with tumor grade and histology of EC	and high immune scores may exert a protective influence on the survival outcome for EC. WCGNA indicated that the black module was significantly correlated with the immune score. Function analysis revealed it mainly involved in those terms related to immune regulation and inflammatory response. Moreover	11 key genes (APOL3	C10orf54	CLEC2B	GIMAP1	GIMAP4	GIMAP6	GIMAP7	GIMAP8	GYPC	IFFO1	TAGAP) were identified from the black module	validated by the GEPIA database	and revealed strong correlations with infiltration levels of multiple immune cell types	as was the prognosis of EC.Conclusion: In this study	11 key genes showed abnormal express..." addthis:url="https://www.frontiersin.org/article/10.3389/fmolb.2021.645388" title="Facebook" href="https://www.frontiersin.org/articles/10.3389/fmolb.2021.645388/full#"><span class="at-icon-wrapper" style="background-color: rgb(59	89	152); line-height: 16px; height: 16px; width: 16px;"><svg xmlns="http://www.w3.org/2000/svg" xmlns:xlink="http://www.w3.org/1999/xlink" viewBox="0 0 32 32" version="1.1" role="img" aria-labelledby="at-svg-facebook-1" title="Facebook" alt="Facebook" class="at-icon at-icon-facebook" style="width: 16px; height: 16px;"><title id="at-svg-facebook-1">Facebook</title><g><path d="M22 5.16c-.406-.054-1.80…
</div>
<a><span class="facebook_count">0</span></a>
</li>
<li class="social_block">
<div class="atButton">
<a class="addthis_button_twitter at300b" addthis:title="Mining TCGA data for key biomarkers related to immune microenvironment in endometrial carcinoma by immune score and weighted correlation network analysis" addthis:description="Background: Endometrial cancer (EC) is one of the most lethal gynecological cancers around the world. The aim of this study is to identify the potential immune microen…	CIBERSORT was applied to evaluate the relative abundances of 22 immune cell types in EC.Results: Immune scores were significantly associated with tumor grade and histology of EC	and high immune scores may exert a protective influence on the survival outcome for EC. WCGNA indicated that the black module was significantly correlated with the immune score. Function analysis revealed it mainly involved in those terms related to immune regulation and inflammatory response. Moreover	11 key genes (APOL3	C10orf54	CLEC2B	GIMAP1	GIMAP4	GIMAP6	GIMAP7	GIMAP8	GYPC	IFFO1	TAGAP) were identified from the black module	validated by the GEPIA database	and revealed strong correlations with infiltration levels of multiple immune cell types	as was the prognosis of EC.Conclusion: In this study	11 key genes showed abnormal express..." addthis:url="https://www.frontiersin.org/article/10.3389/fmolb.2021.645388" title="Tweet" href="https://www.frontiersin.org/articles/10.3389/fmolb.2021.645388/full#"><span class="at-icon-wrapper" style="background-color: rgb(29	161	242); line-height: 16px; height: 16px; width: 16px;"><svg xmlns="http://www.w3.org/2000/svg" xmlns:xlink="http://www.w3.org/1999/xlink" viewBox="0 0 32 32" version="1.1" role="img" aria-labelledby="at-svg-twitter-2" title="Twitter" alt="Twitter" class="at-icon at-icon-twitter" style="width: 16px; height: 16px;"><title id="at-svg-twitter-2">Twitter</title><g><path d="M27.996 10.116c-.81.36-1.68.60…
</div>
<a><span class="twitter_count">0</span></a>
</li>
<li class="social_block">
<div class="atButton">
<a class="addthis_button_linkedin at300b" addthis:title="Mining TCGA data for key biomarkers related to immune microenvironment in endometrial carcinoma by immune score and weighted correlation network analysis" addthis:description="Background: Endometrial cancer (EC) is one of the most lethal gynecological cancers around the world. The aim of this study is to identify the potential immune microe…	CIBERSORT was applied to evaluate the relative abundances of 22 immune cell types in EC.Results: Immune scores were significantly associated with tumor grade and histology of EC	and high immune scores may exert a protective influence on the survival outcome for EC. WCGNA indicated that the black module was significantly correlated with the immune score. Function analysis revealed it mainly involved in those terms related to immune regulation and inflammatory response. Moreover	11 key genes (APOL3	C10orf54	CLEC2B	GIMAP1	GIMAP4	GIMAP6	GIMAP7	GIMAP8	GYPC	IFFO1	TAGAP) were identified from the black module	validated by the GEPIA database	and revealed strong correlations with infiltration levels of multiple immune cell types	as was the prognosis of EC.Conclusion: In this study	11 key genes showed abnormal express..." addthis:url="https://www.frontiersin.org/article/10.3389/fmolb.2021.645388" title="LinkedIn" target="_blank" href="https://www.frontiersin.org/articles/10.3389/fmolb.2021.645388/full#"><span class="at-icon-wrapper" style="background-color: rgb(0	119	181); line-height: 16px; height: 16px; width: 16px;"><svg xmlns="http://www.w3.org/2000/svg" xmlns:xlink="http://www.w3.org/1999/xlink" viewBox="0 0 32 32" version="1.1" role="img" aria-labelledby="at-svg-linkedin-3" title="LinkedIn" alt="LinkedIn" class="at-icon at-icon-linkedin" style="width: 16px; height: 16px;"><title id="at-svg-linkedin-3">LinkedIn</title><g><path d="M26 25.963h-4.185v-6.55c…
</div>
<a><span class="linkedin_count">0</span></a>
</li>
<li class="social_block">
<div class="atButton">
<a class="addthis_button_more at300b" addthis:title="Mining TCGA data for key biomarkers related to immune microenvironment in endometrial carcinoma by immune score and weighted correlation network analysis" addthis:description="Background: Endometrial cancer (EC) is one of the most lethal gynecological cancers around the world. The aim of this study is to identify the potential immune microenvir…	CIBERSORT was applied to evaluate the relative abundances of 22 immune cell types in EC.Results: Immune scores were significantly associated with tumor grade and histology of EC	and high immune scores may exert a protective influence on the survival outcome for EC. WCGNA indicated that the black module was significantly correlated with the immune score. Function analysis revealed it mainly involved in those terms related to immune regulation and inflammatory response. Moreover	11 key genes (APOL3	C10orf54	CLEC2B	GIMAP1	GIMAP4	GIMAP6	GIMAP7	GIMAP8	GYPC	IFFO1	TAGAP) were identified from the black module	validated by the GEPIA database	and revealed strong correlations with infiltration levels of multiple immune cell types	as was the prognosis of EC.Conclusion: In this study	11 key genes showed abnormal express..." addthis:url="https://www.frontiersin.org/article/10.3389/fmolb.2021.645388" title="View more services" target="_blank" href="https://www.frontiersin.org/articles/10.3389/fmolb.2021.645388/full#"><span class="at-icon-wrapper" style="background-color: rgb(255	101	80); line-height: 16px; height: 16px; width: 16px;"><svg xmlns="http://www.w3.org/2000/svg" xmlns:xlink="http://www.w3.org/1999/xlink" viewBox="0 0 32 32" version="1.1" role="img" aria-labelledby="at-svg-addthis-4" title="More" alt="More" class="at-icon at-icon-addthis" style="width: 16px; height: 16px;"><title id="at-svg-addthis-4">AddThis</title><g><path d="M18 14V8h-4v6H8v4h6v6h4v-6h6v-4h-6z" …
</div>
<a><span class="total_count">New</span></a>
</li>
</ul>
</div>
</aside>
<main class="b col-xs-12 col-sm-12 col-lg-8 col-lg-push-2 col-md-7 col-md-push-2 pull-left">
<div class="article-section">
<div class="article-container" data-html="False">
<div class="abstract-container">
<div class="article-header-container">
<!-- Start CrossMark Snippet v2.0 -->
<!-- End CrossMark Snippet -->
<div class="header-bar-one">
<h2>
Original Research ARTICLE
</h2>
</div>
<div class="header-bar-three">
Front. Mol. Biosci.
| doi: 10.3389/fmolb.2021.645388 </div>
</div>
<div class="JournalAbstract">
<h1>
Mining TCGA data for key biomarkers related to immune microenvironment in endometrial carcinoma by immune score and weighted correlation network analysis
<span class="provisional-message">
<span class="label label-success">Provisionally accepted</span> <small class="provisional-text">
The final	formatted version of the article will be published soon.
<a href="https://www.frontiersin.org/articles/10.3389/fmolb.2021.645388/full" id="article_notifyme" data-toggle="modal" class="btn-notify text-green">
<i class="fa fa-envelope"></i>
<b>Notify me</b>
</a>
</small>
</span>
</h1>
<div class="authors">
<a href="https://loop.frontiersin.org/people/1179193/overview"> <img alt=" " class="pr5" src="./Datasheet1_files/24">Guo Chengbin</a><sup>1</sup>	<a href="https://loop.frontiersin.org/people/1266833/overview"> <img alt=" " class="pr5" src="./Datasheet1_files/24(1)">Yuqin Tang</a><sup>2</sup>	<a href="https://loop.frontiersin.org/people/974346/overview"> <img alt=" " class="pr5" src="./Datasheet1_files/24(2)">Yongqiang Zhang</a><sup>3	4*</sup> and <a href="https://loop.frontiersin.org/people/1262613/overview"> <img alt=" " class="pr5" src="./Datasheet1_files/24(3)">Gen Li</a><sup>1*</sup> </div>
<ul class="notes">
<li>
<span><sup>1</sup></span>Guangzhou Women and Children’s Medical Center	Guangzhou Medical University	China
</li>
<li>
<span><sup>2</sup></span>School of Basic Medical Sciences	Chengdu University of Traditional Chinese Medicine	China
</li>
<li>
<span><sup>3</sup></span>Molecular Medicine Research Center	West China Hospital of Sichuan University	China
</li>
<li>
<span><sup>4</sup></span>West China School of Medicine	West China Hospital	Sichuan University	China
</li>
</ul>
<p>
Background: Endometrial cancer (EC) is one of the most lethal gynecological cancers around the world. The aim of this study is to identify the potential immune microenvironment-related biomarkers associated with the prognosis for EC.<br>Methods: RNA-seq data and clinical information of EC patients were derived from The Cancer Genome Atlas (TCGA). The immune score of each EC sample was obtained by…	CIBERSORT was applied to evaluate the relative abundances of 22 immune cell types in EC.<br>Results: Immune scores were significantly associated with tumor grade and histology of EC	and high immune scores may exert a protective influence on the survival outcome for EC. WCGNA indicated that the black module was significantly correlated with the immune score. Function analysis revealed it mainly involved in those terms related to immune regulation and inflammatory response. Moreover	11 key genes (APOL3	C10orf54	CLEC2B	GIMAP1	GIMAP4	GIMAP6	GIMAP7	GIMAP8	GYPC	IFFO1	TAGAP) were identified from the black module	validated by the GEPIA database	and revealed strong correlations with infiltration levels of multiple immune cell types	as was the prognosis of EC.<br>Conclusion: In this study	11 key genes showed abnormal expressions and strong correlations with immune infiltration in EC	most of which were significantly associated with the prognosis of EC. These findings made them promising therapeutic targets for the treatment of EC.
</p>
<div class="clear"></div>
</div>
<div class="thinLineM20"></div>
<div class="AbstractSummary">
<p>
<span>Keywords: </span>
endometrial cancer	immune microenvironment	biomarker	Estimate	CIBERSORT	WCGNA
</p>
<p id="timestamps">
<span>Received: </span>23 Dec 2020;
<span>Accepted: </span>16 Feb 2021.
<br> </p>
<p>
<span>Copyright: </span>© 2021 Chengbin	Tang	Zhang and Li. This is an open-access article distributed under the terms of the <a href="http://creativecommons.org/licenses/by/4.0/">Creative Commons Attribution License (CC BY)</a>. The use	distribution or reproduction in other forums is permitted	provided the original author(s) and the copyright owner(s) are credited and that the original publication in this journal is cited	in accordance with accepted academic practice. No use	distribution or reproduction is permitted which does not comply with these terms.
</p>
<p>
<span>* Correspondence: </span>
<br> Mx. Yongqiang Zhang	Molecular Medicine Research Center	West China Hospital of Sichuan University	Chengdu	610041	Sichuan Province	China	859815764@qq.com <br> Dr. Gen Li	Guangzhou Women and Children’s Medical Center	Guangzhou Medical University	Guangzhou	Guangdong Province	China	superleegen@hotmail.com </p>
<div class="clear"></div>
</div>
<div class="thin-line-dark"></div>
<div class="social-feed"></div>
<div class="container-bordered comment-list social-feed">
<div class="container-comments">
<div class="w100pc float_left CommentsHolder" id="div_article_comment_holder">
</div>
<div id="div_add_comment" class="commentBox">
<div class="imgTn32" style="display: none;">
<img src="./Datasheet1_files/default_profile_32.jpg" alt="" onerror="if (!this.src.endsWith(&#39;/Areas/Articles/Images/Frontiers/Common/Profile/default_profile_32.jpg&#39;)) this.src=&#39;/Areas/Articles/Images/Frontiers/Common/Profile/default_profile_32.jpg&#39;;">
</div>
<div class="wrapper pt4 pb4 wAuto">
<textarea onfocus="showUserImageOnAdd(this)" onblur="hideUserImage(this)" id="txt_comment" cols="" rows="1" style="overflow: hidden; word-wrap: break-word; resize: horizontal;" data-test-id="article_comment_add_textarea" class="write setfocus autoext w535 frUIResizeTextArea comment-textarea is-ui animated-resize grey_90">Write a comment...</textarea>
</div>
<div class="commentAddWrap">
<div>
<a class="addBtnComment" data-test-id="article_comment_add_button" onclick="javascript:AddComments(this);" href="javascript:void(0);" id="btnAddcom"><span>Add</span></a>
</div>
</div>
</div>
</div>
</div>
</div>
</div>
</div>
</main>
<div class="clearfix visible-sm"></div>
<div class="c col-xs-12 col-sm-12 col-lg-2 col-md-3 pull-right side-article related right-container-articles" style="clear: right !important">
<article class="widget-listing commentary-article hidden">
<h5 class="like-h4">COMMENTARY</h5>
</article>
<article class="widget-listing original-article hidden">
<h5 class="like-h4">ORIGINAL ARTICLE</h5>
</article>
<article class="widget-listing people-also-looked-at side-article-related">
<h5 class="like-h4">People also looked at</h5>
<div class="teaser"><div class="heading-container"><h2 class="teaser-heading"><a href="https://www.frontiersin.org/articles/10.3389/fcell.2020.529386/full">Integrative Analysis of DNA Methylation and Gene Expression to Determine Specific Diagnostic Biomarkers and Prognostic Biomarkers of Breast Cancer</a></h2><p class="teaser-authors"><a href="https://loop.frontiersin.org/people/892034/overview">…	Yilin Wang	Yan Wang	Longyang Jiang	Xueping Li	Hua Gao	<a href="https://loop.frontiersin.org/people/797028/overview">Minjie Wei</a> and <a href="https://loop.frontiersin.org/people/1036219/overview">Lin Zhao</a></p></div></div><div class="teaser"><div class="heading-container"><h2 class="teaser-heading"><a href="https://www.frontiersin.org/articles/10.3389/fmolb.2017.00024/full">DNA Sequence Analysis in Clinical Medicine	Proceeding Cautiously</a></h2><p class="teaser-authors"><a href="https://loop.frontiersin.org/people/396450/overview">Moyra Smith</a></p></div></div><div class="teaser"><div class="heading-container"><h2 class="teaser-heading"><a href="https://www.frontiersin.org/articles/10.3389/fcell.2020.00501/full">Role of Epithelial-Mesenchymal Transition in Retinal Pigment Epithelium Dysfunction</a></h2><p …	<a href="https://loop.frontiersin.org/people/963508/overview">Jasmine S. Geathers</a>	<a href="https://loop.frontiersin.org/people/963400/overview">Stephanie L. Grillo</a>	<a href="https://loop.frontiersin.org/people/940391/overview">Sarah R. Weber</a>	Weiwei Wang	Yuanjun Zhao and Jeffrey M. Sundstrom</p></div></div><div class="teaser"><div class="heading-container"><h2 class="teaser-heading"><a href="https://www.frontiersin.org/articles/10.3389/fonc.2020.00768/full">Exploration of Potential Roles of m6A Regulators in Colorectal Cancer Prognosis</a></h2><p class="teaser-authors"><a href="https://loop.frontiersin.org/people/971611/overview">Liechen Ji</a>	<a href="https://loop.frontiersin.org/people/836497/overview">Shuo Chen</a>	<a href="https://loop.frontiersin.org/people/971817/overview">Liqiang Gu</a> and <a href="https://loop.frontiersin.org/people/842587/overview">Xipeng Zhang</a></p></div></div><div class="teaser"><div class="heading-container"><h2 class="teaser-heading"><a href="https://www.frontiersin.org/articles/10.3389/fmolb.2021.619110/full">Screening and Identification of Key Common and Specific Genes and Th…	Pingping Gao	Yanling Li	Zexuan Yan	Zaihui Peng	Yi Zhang	<a href="https://loop.frontiersin.org/people/905823/overview">Fei Han</a> and <a href="https://loop.frontiersin.org/people/804101/overview">Xiaowei Qi</a></p></div></div></article>
<div class="side-article-mrk clearfix hidden-md hidden-lg">
<p style="text-align: center;"><a href="https://spotlight.frontiersin.org/submit?utm_source=fweb&amp;utm_medium=fjour&amp;utm_campaign=rtlg_2020_gen"><img src="./Datasheet1_files/article-marketing-message-79982763-254d-4bb6-96b8-126758de1166.png" alt=""><br></a></p>
<p style="text-align: center;"><a href="https://spotlight.frontiersin.org/submit?utm_source=fweb&amp;utm_medium=fjour&amp;utm_campaign=rtlg_2020_gen"><strong>Suggest a Research Topic &gt;</strong></a></p>
</div>
</div>
</div>
</div>
</div>
<div id="divTemplates">
<div class="modal fade modal-container impact-modal-container" data-backdrop="static" id="impactModal" tabindex="-1" role="dialog" aria-labelledby="myModalLabel" aria-hidden="true">
</div>
<div class="modal fade modal-container supplementary-modal-container in" data-backdrop="static" data-keyboard="false" id="supplementaryFilesModal" tabindex="-1" role="dialog" aria-labelledby="mySupplementaryModalLabel" aria-hidden="false" style="display: block; padding-right: 17px;"><div class="modal-backdrop fade in" style="height: 562px;"></div>
<div class="supplementary-material-wrapper modal-dialog" role="document">
<div class="modal-content">
<div class="modal-body">
<a class="close" data-dismiss="modal" aria-label="Close"><span aria-hidden="true">×</span></a>
<h4>Supplementary Material</h4><br>
<p class="supplementary-empty-message" style="display: none;">There is no supplementary material currently available for this article</p>
<div class="loading-wrapper" id="loader" style="display: none;">
Loading supplemental data...
<img style="" src="./Datasheet1_files/loading.gif" alt="Loading..">
</div>
<br>
<div class="table-responsive" id="localFiles">
<table class="table table-striped supplementary-content" id="localFilesTable" style="display: table;">
<thead>
<tr>
<th>&nbsp;</th>
<th>File Name</th>
<th>&nbsp;</th>
</tr>
</thead>
<tbody class="file-content">
<tr>
<th scope="row"><a data-test-id="article-supplemental-data-1" href="https://www.frontiersin.org/articles/file/downloadfile/645388_supplementary-materials_tables_1_docx/octet-stream/Table%201.DOCX/1/645388"><img class="img-figure" src="./Datasheet1_files/ico-table.png"></a></th>
<td>
<a href="https://www.frontiersin.org/articles/file/downloadfile/645388_supplementary-materials_tables_1_docx/octet-stream/Table%201.DOCX/1/645388">
Table 1.DOCX
</a>
</td>
<td><a href="https://www.frontiersin.org/articles/file/downloadfile/645388_supplementary-materials_tables_1_docx/octet-stream/Table%201.DOCX/1/645388" class="btn-link"><i class="fa fa-download" aria-hidden="true"></i></a></td>
</tr>
<tr>
<th scope="row"><a data-test-id="article-supplemental-data-2" href="https://www.frontiersin.org/articles/file/downloadfile/645388_supplementary-materials_datasheets_1_csv/octet-stream/Data%20Sheet%201.CSV/1/645388"><img class="img-figure" src="./Datasheet1_files/ico-data.png"></a></th>
<td>
<a href="https://www.frontiersin.org/articles/file/downloadfile/645388_supplementary-materials_datasheets_1_csv/octet-stream/Data%20Sheet%201.CSV/1/645388">
Data Sheet 1.CSV
</a>
</td>
<td><a href="https://www.frontiersin.org/articles/file/downloadfile/645388_supplementary-materials_datasheets_1_csv/octet-stream/Data%20Sheet%201.CSV/1/645388" class="btn-link"><i class="fa fa-download" aria-hidden="true"></i></a></td>
</tr>
<tr>
<th scope="row"><a data-test-id="article-supplemental-data-3" href="https://www.frontiersin.org/articles/file/downloadfile/645388_supplementary-materials_datasheets_2_csv/octet-stream/Data%20Sheet%202.CSV/1/645388"><img class="img-figure" src="./Datasheet1_files/ico-data.png"></a></th>
<td>
<a href="https://www.frontiersin.org/articles/file/downloadfile/645388_supplementary-materials_datasheets_2_csv/octet-stream/Data%20Sheet%202.CSV/1/645388">
Data Sheet 2.CSV
</a>
</td>
<td><a href="https://www.frontiersin.org/articles/file/downloadfile/645388_supplementary-materials_datasheets_2_csv/octet-stream/Data%20Sheet%202.CSV/1/645388" class="btn-link"><i class="fa fa-download" aria-hidden="true"></i></a></td>
</tr>
</tbody>
</table>
</div>
<div id="figshare-widget-container">
</div>
</div>
<br>
<div class="modal-footer bottom-links">
<a class="btn btn-default" data-dismiss="modal">Close</a>
</div>
</div>
</div>
</div>
<script type="text/template" id="template-supplementary-files-modal">
<div class="supplementary-material-wrapper modal-dialog" role="document">
<div class="modal-content">
<div class="modal-body">
<a class="close" data-dismiss="modal" aria-label="Close"><span aria-hidden="true">×</span></a>
<h4>Supplementary Material</h4><br>
<p class="supplementary-empty-message">There is no supplementary material currently available for this article</p>
<div class="loading-wrapper"
id="loader"
style="display:none">
Loading supplemental data...
<img style="" src="/Areas/Articles/Images/Icon/loading.gif" alt="Loading.." />
</div>
<br />
<div class="table-responsive" id="localFiles">
</div>
<div id="figshare-widget-container">
</div>
</div>
<br />
<div class="modal-footer bottom-links">
<a class="btn btn-default" data-dismiss="modal">Close</a>
</div>
</div>
</div>
</script>
<script type="text/template" id="template-local-files-modal">
<table class="table table-striped supplementary-content" id="localFilesTable">
<thead>
<tr>
<th>&nbsp;</th>
<th>File Name</th>
<th>&nbsp;</th>
</tr>
</thead>
<tbody class="file-content">
<% _.each(supplimentalFileDetails.FileDetails	function(fileViewModel){ %>
<tr>
<th scope="row"><a data-test-id="<%= fileViewModel.TestId %>" href="<%= fileViewModel.FileDownloadUrl %>"><img class="img-figure" src="<%= fileViewModel.ImageUrl %>"></a></th>
<td>
<a href="<%= fileViewModel.FileDownloadUrl %>">
<%= fileViewModel.FileName %>
</a>
</td>
<td><a href="<%= fileViewModel.FileDownloadUrl %>" class="btn-link"><i class="fa fa-download" aria-hidden="true"></i></a></td>
</tr>
<% }); %>
</tbody>
</table>
</script>
<div class="modal fade modal-container notifyme-modal-container" data-backdrop="static" id="notifyModal" tabindex="-1" role="dialog" aria-labelledby="Notify on publication" aria-hidden="true">
</div>
<script type="text/template" id="template-notify-me-modal">
<div class="modal-f page-container simple-modal" role="dialog" aria-labelledby="NotfifyMeModalLabel">
<div class="modal-dialog" role="document">
<div class="modal-content">
<form onsubmit="return false" id="modalnotifyme">
<div class="modal-header">
<button type="button" class="close" data-dismiss="modal" aria-label="Close"><span aria-hidden="true">×</span></button>
<h3>Notify me on publication</h3>
</div>
<div class="modal-body">
<div class="form-group">
<label>Please enter your email address:</label>
<input type="email" required class="form-control" id="txt_notification_email_id" placeholder="Email">
</div>
<div class="g-recaptcha" id="recaptcha"></div><br />
<p class="small" style="color: #555;">If you already have an account	please <a href="<%=login.FrontiersLoginUrl%>?returnUrl=<%=currentPage%>" class="text-blue">login</a>.</p>
<p class="small" style="color: #555;">You don't have a Frontiers account ? You can <a href="<%=login.FrontiersRegistrationUrl%>" class="text-blue">register here</a>.</p>
</div>
<div class="modal-footer">
<button type="button" id="article_notify_non_registered_user" class="btn btn-default btn-progress" style="width: 118px; visibility:hidden;">Notify me</button>
</div>
</form>
</div>
</div>
</div>
</script>
<script type="text/template" id="template-notifyme-mailselection-modal">
<div class="modal-f page-container simple-modal" tabindex="-1" role="dialog" aria-labelledby="NotfifyMeModalLabel">
<div class="modal-dialog" role="document">
<div class="modal-content">
<div class="modal-header">
<button type="button" class="close" data-dismiss="modal" aria-label="Close"><span aria-hidden="true">×</span></button>
<h3>Select one of your emails</h3>
</div>
<div class="modal-body">
<form>
<div class="form-group">
<label>You have multiple emails registered with Frontiers:</label>
</div>
<% _.each(userEmailList	function(user){ %>
<input type="radio" value="<%=user%>" name="notify_Emailcollection"> <%=user%><br>
<% }); %>
</form>
</div>
<div class="modal-footer">
<button type="button" id="article_notify_loggedin_user" class="btn btn-default btn-progress" style="width: 118px;">Notify me</button>
</div>
</div>
</div>
</div>
</script>
<script type="text/template" id="template_notifyme_error_modal">
<div class="modal-f page-container simple-modal" tabindex="-1" role="dialog" aria-labelledby="NotfifyMeModalLabel">
<div class="modal-dialog" role="document">
<div class="modal-content">
<div class="modal-header">
<button type="button" class="close" data-dismiss="modal" aria-label="Close"><span aria-hidden="true">×</span></button>
<h3>Notify me on publication</h3>
</div>
<div class="modal-body">
<form>
<div class="form-group">
<p class="text-red"><strong><%=message%></strong></p>
</div>
</form>
</div>
<div class="modal-footer">
<button type="button" data-dismiss="modal" class="btn btn-default btn-progress" style="width: 118px;">Cancel</button>
</div>
</div>
</div>
</div>
</script>
<script type="text/template" id="template-article-comments">
<div class="w100pc float_left CommentsHolder" id="div_article_comment_holder">
<% if(journalComments.Count !=0) { %>
<div id="divActivityBox" class="commentBox bubbleInfo " style="z-index: 300;">
<div class="float_left w100pc divActivityBox">
<p id="pAllUsers" class="pb0 float_left w581 pAllUsers">
<a id="aAllUsers" href="javascript:void(0);" class="fontnormal trigger">
<%- journalComments.Count %> Comments
</a> <%= journalComments.CommentedUsers %>
</p>
</div>
</div>
<% } %>
<% _.each( journalComments.Comments	function( comment ){ %>
<div class="commentBox">
<% if (comment.IsDeleted) {%>
<div class="wrapper pt4 pb4">
<div class="imgHolder mr10"> <!--<a class="fontnormal">--><img width="32" src="/Areas/Articles/Design/Images/default_profile_32.jpg" onerror="if (!this.src.endsWith('/Areas/Articles/Design/Images/default_profile_32.jpg')) this.src='/Areas/Articles/Design/Images/default_profile_32.jpg';" alt=""><!--</a>--></div>
<div class="content w555">
<!-- <p class="mtm3" style='word-wrap:break-word'><a class="fontnormal">User</a> </p>-->
<p class="mtm3">User</p><ul class="toolbar mt4 disblk w100pc">
<li class="pl0">
<p class="date">Comment deleted on <%- GetFormattedCommentDeletedDate(comment.CommentedDate) %></p>
</li>
<li class="float_right pr0"></li>
</ul>
</div>
</div>
<% } else {%>
<div class="wrapper pt4 pb4">
<div class="imgHolder mr10"> <a class="fontnormal" data-test-id="article_commenteduser_profileimage_link" href="<%- comment.CommentedUser.ProfileUrl %>"><img src="<%- comment.CommentedUser.ThumbnailUrl %>" onerror="if (!this.src.endsWith('/Areas/Articles/Images/Frontiers/Common/Profile/default_profile_32.jpg')) this.src='/Areas/Articles/Images/Frontiers/Common/Profile/default_profile_32.jpg';" al…
<div class="content w555 comment-body">
<p class="mtm3" style="word-wrap:break-word">
<a class="fontnormal" data-test-id="article_commenteduser_profile_link" href="<%- comment.CommentedUser.ProfileUrl %>">
<%- comment.CommentedUser.FullName %>
</a>
<span class="comment-text"><%= comment.Comment %></span>
</p>
<ul class="toolbar mt4 disblk w100pc">
<li class="pl0"><p class="date"><%- GetFormattedCommentDate(comment.CommentedDate) %></p></li>
<% if (comment.IsEditVisible)
{ %>
<li>|</li>
<li><a href="javascript:void(0);" data-test-id="article_comment_edit_link" class="fontnormal btn-edit-comment" id="btnEditcom" data-comment-id="<%- comment.CommentId %>">Edit</a></li>
<% } %>
<% if (comment.IsDeleteVisible)
{ %>
<li>|</li>
<li><a href="javascript:void(0);" data-test-id="article_comment_delete_link" class="fontnormal btn-delete-comment" id="btnDeletecom" data-comment-id="<%- comment.CommentId %>">Delete</a></li>
<% }%>
<li class="float_right pr0"></li>
</ul>
</div>
</div>
<% }%>
</div>
<% }); %>
</div>
<div id="div_add_comment" class="commentBox">
<div class="imgTn32"
style="display: none;">
<% if(journalComments.LoginUserId !=0) { %>
<img src="<%- journalComments.LoggedInUserInfo.ThumbnailUrl %>" alt=""
onerror="if (!this.src.endsWith('/Areas/Articles/Images/Frontiers/Common/Profile/default_profile_32.jpg')) this.src='/Areas/Articles/Images/Frontiers/Common/Profile/default_profile_32.jpg';">
<% } else {%>
<img src="/Areas/Articles/Design/Images/default_profile_32.jpg" alt=""
onerror="if (!this.src.endsWith('/Areas/Articles/Images/Frontiers/Common/Profile/default_profile_32.jpg')) this.src='/Areas/Articles/Images/Frontiers/Common/Profile/default_profile_32.jpg';">
<% }%>
</div>
<div class="wrapper pt4 pb4 wAuto">
<textarea onfocus="showUserImageOnAdd(this)"
onblur="hideUserImage(this)"
id="txt_comment"
cols=""
rows="1"
style="overflow: hidden; word-wrap: break-word; resize: horizontal;"
data-test-id="article_comment_add_textarea"
class="write setfocus autoext w535 frUIResizeTextArea comment-textarea is-ui animated-resize grey_90">Write a comment...</textarea>
</div>
<div class="commentAddWrap">
<div>
<a class="addBtnComment" data-test-id="article_comment_add_button" onclick="javascript:AddComments(this);" href="javascript:void(0);" id="btnAddcom"><span>Add</span></a>
</div>
</div>
</div>
</script>
<script type="text/template" id="template-article-comments-warning">
<div class="commentBox">
<div class="wrapper">
<p class="comment-warning">The comment section has been closed.</p>
</div>
</div>
</script>
<script type="text/template" id="template-article-edit-comments">
<div id="edit-comment-form" class="wrapper pt4 pb4 wAuto edit-comments">
<textarea class="txt-comment"
onfocus="showUserImageOnEdit(this)"
onblur="hideUserImage(this)"
data-test-id="article_comment_edit_textarea"
rows="3"><%= commentText %> </textarea>
<div>
<a class="btn btn-add-comment addBtnComment" data-test-id="article_comment_edit_button" data-comment-id="<%- commentId %>">Add</a>
</div>
</div>
</script>
</div>
</div>
<div data-navigation-plugin="footer"><footer class="PublicFooter PublicFooter--withColumns" id="PublicFooter">
<div class="PublicFooter__wrapper">
<ul class="PublicFooter__social">
<li class="PublicFooter__social__item" data-test-id="facebook_link">
<a class="pfsi-facebook" href="https://www.facebook.com/Frontiersin" data-event="footer-navigation" data-event-param="social_media">
</a>
</li>
<li class="PublicFooter__social__item" data-test-id="twitter_link">
<a class="pfsi-twitter" href="https://twitter.com/frontiersin" data-event="footer-navigation" data-event-param="social_media">
</a>
</li>
<li class="PublicFooter__social__item" data-test-id="linkedin_link">
<a class="pfsi-linkedin" href="https://www.linkedin.com/company/frontiers" data-event="footer-navigation" data-event-param="social_media">
</a>
</li>
<li class="PublicFooter__social__item" data-test-id="instagram_link">
<a class="pfsi-instagram" href="https://www.instagram.com/frontiersin_" data-event="footer-navigation" data-event-param="social_media">
</a>
</li></ul>
<div class="PublicFooter__menu" id="PublicFooterMenu">
<ul class="PublicFooter__menu__wrapper" id="PublicFooterMenuWrapper">
<li class="PublicFooter__menu__item" data-test-id="about_frontiers_link"> <a href="https://www.frontiersin.org/about" data-event="footer-navigation" data-event-param="about_frontiers">About Frontiers</a></li>
<li class="PublicFooter__menu__item" data-test-id="institutional_membership_link"> <a href="https://www.frontiersin.org/about/Institutional_Membership" data-event="footer-navigation" data-event-param="institutional_membership">Institutional Membership</a></li>
<li class="PublicFooter__menu__item" data-test-id="books_link"> <a href="https://www.frontiersin.org/books/all_books" data-event="footer-navigation" data-event-param="books">Books</a></li>
<li class="PublicFooter__menu__item" data-test-id="news_link"> <a href="https://blog.frontiersin.org/" data-event="footer-navigation" data-event-param="news">News</a></li>
<li class="PublicFooter__menu__item" data-test-id="frontiers_social_media_link"> <a href="https://blog.frontiersin.org/2013/11/01/frontiers-social-media-and-rss" data-event="footer-navigation" data-event-param="frontiers_social_media">Frontiers' social media</a></li>
<li class="PublicFooter__menu__item" data-test-id="contact_link"> <a href="https://www.frontiersin.org/about/contact" data-event="footer-navigation" data-event-param="contact">Contact</a></li>
<li class="PublicFooter__menu__item" data-test-id="careers_link"> <a href="https://www.frontiersin.org/Careers" data-event="footer-navigation" data-event-param="careers">Careers</a></li>
<li class="PublicFooter__menu__item" data-test-id="submit_link"> <a href="https://www.frontiersin.org/submissioninfo" data-event="footer-navigation" data-event-param="submit">Submit</a></li>
<li class="PublicFooter__menu__item" data-test-id="newsletter_link"> <a href="http://connect.frontiersin.org/subscriptions/subscribe" data-event="footer-navigation" data-event-param="newsletter">Newsletter</a></li>
<li class="PublicFooter__menu__item" data-test-id="help_center_link"> <a href="https://frontiers.zendesk.com/hc/en-us" data-event="footer-navigation" data-event-param="help_center">Help Center</a></li>
<li class="PublicFooter__menu__item" data-test-id="terms_conditions_link"> <a href="https://www.frontiersin.org/TermsandConditions.aspx" data-event="footer-navigation" data-event-param="terms_conditions">Terms &amp; Conditions</a></li>
<li class="PublicFooter__menu__item" data-test-id="privacy_policy_link"> <a href="https://www.frontiersin.org/legal/privacy-policy" data-event="footer-navigation" data-event-param="privacy_policy">Privacy Policy</a></li>
</ul></div>
</div>
<div class="PublicFooter__copy" data-test-id="copywright_text">
© 2007 - 2021 Frontiers Media S.A. All Rights Reserved
</div>
</footer></div>
<script src="./Datasheet1_files/js(2)"></script>
<script src="./Datasheet1_files/MathJax.js.download"></script>
<script src="./Datasheet1_files/embed.js.download"></script>
<script src="./Datasheet1_files/frontiers"></script>
<script type="text/javascript">
var FRArticle = (function() {
return {
ArticleId: '645388'
DOI:'10.3389/fmolb.2021.645388'
LoginUserId: '1050259'
DomainId: '1'
FieldId: '102'
SpecialityId: '1476'
IsPreview: FRSafe.boolean('False')
IsViewImpactFromLoop: FRSafe.boolean('False')
IsPublished: 'False'
FigShareApiUrl: 'https://api.figshare.com/v2/collections/search'
FigShareTimeOut: '3000'
};
})();
var FRSocial = (function() {
return {
itemId: 14
itemTypeId: 1
entityId: '645388'
ownerId: '974346'
sanPath: 'https://www.frontiersin.org/files/'
subItemId: '6'
loginUserId: '1050259'
ownerNWDBId: '27'
pageType: 1
loopUrl:'https://loop.frontiersin.org'
};
})();
</script>
<script>
var FRAjaxSettings = (function () {
function urlLowercase() {
$.ajaxSetup({
beforeSend: function (jqXHR	settings) {
settings.url = settings.url.toLowerCase();
}
});
}
return { urlLowercase: urlLowercase };
})();
FRAjaxSettings.urlLowercase();
</script>
<script src="./Datasheet1_files/schema"></script>
<script src="./Datasheet1_files/app(1)"></script>
<script src="./Datasheet1_files/figshare.js.download"></script>
<script type="text/javascript" src="./Datasheet1_files/fmolb.2021.645388"></script><div style="display: none; visibility: hidden;">
<script src="./Datasheet1_files/otSDKStub.js.download" type="text/javascript" charset="UTF-8" data-domain-script="1e9ad659-0bd5-4a8a-9508-487c73b460bd"></script>
<script type="text/javascript">function OptanonWrapper(){};</script>
</div>
<script type="text/javascript" id="">!function(b	e	f	g	a	c	d){b.fbq||(a=b.fbq=function(){a.callMethod?a.callMethod.apply(a	arguments):a.queue.push(arguments)}	b._fbq||(b._fbq=a)	a.push=a	a.loaded=!0	a.version="2.0"	a.queue=[]	c=e.createElement(f)	c.async=!0	c.src=g	d=e.getElementsByTagName(f)[0]	d.parentNode.insertBefore(c	d))}(window	document	script	https://connect.facebook.net/en_US/fbevents.js);fbq("init"	2098247140231737);fbq("track"	PageView);</script>
<noscript><img height="1" width="1" style="display:none" src="https://www.facebook.com/tr?id=2098247140231737&amp;ev=PageView&amp;noscript=1"></noscript>
<script type="text/javascript" id="" src="./Datasheet1_files/collect.js.download"></script><script type="text/javascript" id="" src="./Datasheet1_files/figshare.js(1).download"></script><script type="text/javascript" id="" src="./Datasheet1_files/addthis_widget.js.download"></script><div id="onetrust-consent-sdk"><div class="onetrust-pc-dark-filter ot-hide ot-fade-in"></div><div id="onetrust-pc-s…
background-position: left"></div><button id="close-pc-btn-handler" class="ot-close-icon" aria-label="Close"></button></div><!-- Close Button --><div id="ot-pc-content" class="ot-pc-scrollbar"><h3 id="ot-pc-title">Privacy Preference Center</h3><div id="ot-pc-desc">Our website uses cookies that are necessary for its operation. Additional cookies are only used with your consent. These cookies are us…	navigation usage	geolocation data) and we process them to analyse the traffic on our website in order to provide you a better user experience	evaluate the efficiency of our communications and to personalise content to your interests. Some cookies are placed by third-party companies with which we work to deliver relevant ads on social media and the internet. Click on the different categories' headings to change your cookie preferences. Click on "More Information" if you wish to learn more about how data is collected and shared.
<a href="https://cookiepedia.co.uk/giving-consent-to-cookies" class="privacy-notice-link" target="_blank" aria-label="More information	Opens in a new window">More information</a></div><section class="ot-sdk-row ot-cat-grp"><h3 id="ot-category-title"> Manage Consent Preferences</h3><div class="ot-accordion-layout ot-cat-item" data-optanongroupid="C0001"><button aria-expanded="false" ot-accordion="true" aria-controls="ot-desc-id-C0001" aria-labelledby="ot-header-id-C0001"></button><!-- Accordion header --><div class="ot-acc-hdr ot…	such as setting your privacy preferences	logging in or filling in forms. You can set your browser to block or alert you about these cookies	but some parts of the site will not then work. These cookies do not store any personally identifiable information.</p></div></div><div class="ot-accordion-layout ot-cat-item" data-optanongroupid="C0002"><button aria-expanded="false" ot-accordion="true" aria-controls="ot-desc-id-C0002" aria-labelledby="ot-header-id-C0002"></button><!-- Accordion header --><div class="ot-acc-hdr"><div class="ot-plu…	but are based on uniquely identifying your browser and internet device. If you do not allow these cookies	you will experience less targeted advertising.</p></div></div><!-- Groups sections starts --><!-- Group section ends --><!-- Accordion Group section starts --><!-- Accordion Group section ends --></section></div><section id="ot-pc-lst" class="ot-hide ot-hosts-ui ot-pc-scrollbar"><div id="ot-pc-hdr"><h3 id="ot-lst-title"><button class="ot-link-btn back-btn-handler" aria-label="Back"><svg id="ot-ba…	222.409L351.88	83.653c7.05-7.043	10.567-15.657	10.567-25.841c0-10.183-3.518-18.793-10.567-25.835
l-21.409-21.416C323.432	3.521	314.817	0	304.637	0s-18.791	3.521-25.841	10.561L92.649	196.425
c-7.044	7.043-10.566	15.656-10.566	25.841s3.521	18.791	10.566	25.837l186.146	185.864c7.05	7.043	15.66	10.564	25.841	10.564
s18.795-3.521	25.834-10.564l21.409-21.412c7.05-7.039	10.567-15.604	10.567-25.697c0-10.085-3.518-18.746-10.567-25.978
L213.13	222.409z"></path></g></svg></button> <span>Performance Cookies</span></h3><div class="ot-lst-subhdr"><div class="ot-search-cntr"><label for="vendor-search-handler" class="ot-scrn-rdr">Vendor Search</label> <input id="vendor-search-handler" type="text" placeholder="Search..." name="vendor-search-handler"> <svg xmlns="http://www.w3.org/2000/svg" xmlns:xlink="http://www.w3.org/1999/xlink" x="0px" y=…	51.887L41.588	37.786c3.486-4.144	5.396-9.358	5.396-14.786c0-12.682-10.318-23-23-23s-23	10.318-23	23
s10.318	23	23	23c4.761	0	9.298-1.436	13.177-4.162l13.661	14.208c0.571	0.593	1.339	0.92	2.162	0.92
c0.779	0	1.518-0.297	2.079-0.837C56.255	54.982	56.293	53.08	55.146	51.887z M23.984	6c9.374	0	17	7.626	17	17s-7.626	17-17	17
s-17-7.626-17-17S14.61	6	23.984	6z"></path></svg></div><div class="ot-fltr-cntr"><button id="filter-btn-handler" aria-label="Filter" aria-haspopup="true"><svg role="presentation" aria-hidden="true" xmlns="http://www.w3.org/2000/svg" xmlns:xlink="http://www.w3.org/1999/xlink" x="0px" y="0px" viewBox="0 0 402.577 402.577" xml:space="preserve"><title>Filter Icon</title><g><path fill="#fff" d="M400.858	11.427c-3.241-7.421-8.85-11.132-16.854-11.136H18.564c-7.993	0-13.61	3.715-16.846	11.136
c-3.234	7.801-1.903	14.467	3.999	19.985l140.757	140.753v138.755c0	4.955	1.809	9.232	5.424	12.854l73.085	73.083
c3.429	3.614	7.71	5.428	12.851	5.428c2.282	0	4.66-0.479	7.135-1.43c7.426-3.238	11.14-8.851	11.14-16.845V172.166L396.861	31.413
C402.765	25.895	404.093	19.231	400.858	11.427z"></path></g></svg></button></div><div id="ot-anchor"></div><section id="ot-fltr-modal"><div id="ot-fltr-cnt"><button id="clear-filters-handler">Clear</button><div class="ot-fltr-scrlcnt ot-pc-scrollbar"><div class="ot-fltr-opts"><div class="ot-fltr-opt"><div class="ot-chkbox"><input id="chkbox-id" type="checkbox" aria-checked="false" class="category-filter-handler"> <label for="chkbox-id"…
<script type="text/javascript" id="">function getUrlParameter(a){a=a.replace(/[\[]/	\\[).replace(/[\]]/	\\]);a=new RegExp("[\\?\x26]"+a+"\x3d([^\x26#]*)");a=a.exec(location.search);return null===a?"":decodeURIComponent(a[1].replace(/\+/g	))}var sfmc_sub=getUrlParameter("sfmc_sub");null!=sfmc_sub&&""!=sfmc_sub&&_etmc.push(["setUserInfo"	{email:sfmc_sub}]);_etmc.push(["setOrgId"	7236711]);_etmc.push(["trackPageView"]);</script><div style="display: none;"><img src="./Datasheet1_files/track_page_view" width="0" height="0" title="blank image" alt="" aria-hidden="true" style="display: none;"></div>
<script type="text/javascript" id="">(function(){var a=a||{};a.data_track_addressbar=!1;a.data_track_clickback=!1;!$||$(".side-article-title").show();!$||$(".share-media").show()})();</script></body></html>
[truncated: 982 more columns]
